# Supplementary material
Source: publisher site journal article supplement (https://www.spandidos-publications.com/7980/downloadSupplementary)
Supplement: Supplementary file 1 [file downloadSupplementary]

## Sheet: Supplementary table 1.DEGs
Table SI. List of BRAF V600E-associated DEGs
	logFC	AveExpr	t	P.Value	adj.P.Val	B
DCSTAMP	-5.56426	5.2676	-31.6873	1.25e-120	2.13e-116	264.385
TMPRSS6	-4.24363	4.05306	-30.5714	1.46e-115	1.24e-111	252.824
NECTIN4	-2.54044	4.30432	-23.6135	7.66e-83	4.33e-79	178.068
SYT12	-3.41549	3.63192	-23.4326	5.66e-82	2.4e-78	176.081
FN1	-4.09208	9.94845	-22.9337	1.42e-79	4.8e-76	170.598
TACSTD2	-4.14092	8.20061	-22.7444	1.15e-78	3.26e-75	168.516
EPHA10	-1.72329	2.01365	-22.5094	1.55e-77	3.77e-74	165.931
SLC34A2	-4.48399	9.22172	-21.9621	6.69e-75	1.42e-71	159.907
ERBB3	-1.89825	4.66233	-21.8285	2.94e-74	5.54e-71	158.437
GABRB2	-2.66306	3.63395	-21.7541	6.71e-74	1.14e-70	157.617
PLEKHA6	-1.68188	2.37815	-21.7048	1.16e-73	1.67e-70	157.075
KCNQ3	-1.94003	2.82633	-21.7031	1.18e-73	1.67e-70	157.056
PTPRE	-1.93093	4.10231	-21.5938	3.96e-73	5.17e-70	155.854
KLK7	-3.95027	4.18101	-21.4586	1.77e-72	2.15e-69	154.365
PDLIM4	-2.95368	6.24703	-21.4295	2.45e-72	2.77e-69	154.045
KLK10	-3.36597	4.13838	-21.4016	3.33e-72	3.53e-69	153.738
PROS1	-2.28107	6.97272	-20.9521	4.83e-70	4.82e-67	148.794
LGI3	2.22938	3.07946	20.8787	1.09e-69	1.03e-66	147.987
HGD	2.62395	3.58908	20.8141	2.22e-69	1.99e-66	147.277
WNT10A	-2.44435	2.69849	-20.7588	4.1e-69	3.48e-66	146.669
NGEF	-2.54575	4.25736	-20.6937	8.42e-69	6.81e-66	145.954
RSPO4	-2.34913	3.82043	-20.6076	2.18e-68	1.68e-65	145.008
CYP2S1	-2.37093	3.74964	-20.2169	1.64e-66	1.21e-63	140.719
TMPRSS4	-2.99427	3.46341	-20.0674	8.52e-66	6.02e-63	139.08
CXCL17	-2.98614	4.2091	-20.039	1.17e-65	7.91e-63	138.769
SERPINA1	-3.33287	9.23338	-19.9951	1.89e-65	1.23e-62	138.288
DTX4	-2.36475	7.0855	-19.6306	1.05e-63	6.6e-61	134.297
GRB7	-1.49265	4.96497	-19.4331	9.22e-63	5.59e-60	132.139
STAC	-1.67819	2.13291	-19.2546	6.56e-62	3.84e-59	130.19
WTIP	-1.18045	3.11046	-19.1982	1.22e-61	6.89e-59	129.575
ABTB2	-1.65093	3.90015	-19.1724	1.62e-61	8.86e-59	129.293
OTOS	2.59591	5.19013	19.0787	4.52e-61	2.4e-58	128.272
PNPLA5	-1.78908	1.50837	-19.054	5.93e-61	3.05e-58	128.003
PALM	-1.70126	5.17464	-19.0088	9.73e-61	4.85e-58	127.511
PLCD3	-1.95857	5.65955	-18.948	1.9e-60	9.19e-58	126.848
LAD1	-1.46484	4.77128	-18.9173	2.65e-60	1.25e-57	126.514
GGCT	-1.28747	6.13759	-18.8662	4.64e-60	2.13e-57	125.958
FSTL3	-1.5881	5.38096	-18.8599	4.98e-60	2.22e-57	125.89
KCP	-1.28315	1.83229	-18.8438	5.94e-60	2.58e-57	125.714
CST6	-3.60929	7.96208	-18.7499	1.66e-59	7.03e-57	124.694
GNA14	1.7905	3.54356	18.6316	6.04e-59	2.5e-56	123.409
SPTBN2	-1.45719	2.61016	-18.6053	8.06e-59	3.26e-56	123.123
GJB3	-2.30219	4.05356	-18.5799	1.06e-58	4.2e-56	122.847
EVA1A	-2.09874	4.11755	-18.5666	1.23e-58	4.74e-56	122.703
CYP1B1	-2.69151	4.74962	-18.5575	1.36e-58	5.12e-56	122.605
SDC4	-1.75011	9.90419	-18.464	3.77e-58	1.39e-55	121.59
MET	-1.80967	7.42641	-18.4226	5.92e-58	2.14e-55	121.142
MACC1	-1.61315	2.76125	-18.3651	1.11e-57	3.92e-55	120.519
MPPED2	1.89739	2.02614	18.332	1.59e-57	5.5e-55	120.161
ETHE1	-1.14855	5.7646	-18.1045	1.89e-56	6.42e-54	117.7
SLC4A4	2.16436	2.63148	18.0717	2.7e-56	9e-54	117.345
SELENOV	1.90961	1.50169	18.0456	3.59e-56	1.17e-53	117.064
TGFBR1	-1.38136	5.62825	-18.0261	4.44e-56	1.42e-53	116.854
B3GNT3	-3.22682	4.4183	-17.9975	6.05e-56	1.9e-53	116.545
EPHB3	-1.76665	3.67929	-17.978	7.48e-56	2.31e-53	116.334
SLC27A6	-3.34049	4.89648	-17.9495	1.02e-55	3.09e-53	116.027
CAMK2N1	-2.31036	7.00534	-17.887	2.01e-55	5.98e-53	115.353
MRO	1.61877	1.19937	17.8721	2.36e-55	6.91e-53	115.192
TBC1D2	-1.37977	6.17582	-17.8301	3.72e-55	1.07e-52	114.74
PLEKHD1	1.11688	0.752951	17.7906	5.71e-55	1.61e-52	114.315
CRLF2	-1.73782	1.54233	-17.7882	5.86e-55	1.61e-52	114.289
ELF3	-1.74764	3.66639	-17.788	5.88e-55	1.61e-52	114.287
ITGA3	-1.24511	7.94766	-17.7752	6.75e-55	1.82e-52	114.149
KCNN4	-2.82664	4.54391	-17.7688	7.24e-55	1.92e-52	114.08
PDE5A	-2.01505	5.90333	-17.7563	8.28e-55	2.16e-52	113.946
BNC1	-1.40078	1.39919	-17.7108	1.36e-54	3.48e-52	113.457
DHDH	-1.34169	2.12604	-17.6924	1.65e-54	4.19e-52	113.259
SFTPB	-4.35927	7.46288	-17.6745	2.01e-54	5.01e-52	113.066
CLCNKA	1.97253	1.59952	17.662	2.3e-54	5.65e-52	112.932
BID	-1.10298	4.6844	-17.5539	7.4e-54	1.79e-51	111.771
ZMAT4	2.23071	1.54125	17.5136	1.14e-53	2.73e-51	111.338
PLEKHN1	-1.32896	2.90421	-17.4918	1.45e-53	3.41e-51	111.105
MGAT3	-2.27003	3.91837	-17.4372	2.61e-53	6.06e-51	110.52
MT1G	4.21013	6.73516	17.4282	2.87e-53	6.58e-51	110.423
CFAP99	0.580842	0.730892	17.4271	2.91e-53	6.58e-51	110.411
ELMO1	1.6964	3.57388	17.3918	4.25e-53	9.49e-51	110.034
ST3GAL6	1.20623	2.22648	17.3592	6.05e-53	1.33e-50	109.683
CTSH	-1.68285	6.22441	-17.3461	6.96e-53	1.51e-50	109.544
C11orf80	-0.909786	3.62649	-17.3345	7.89e-53	1.7e-50	109.419
RUNX1	-1.41597	3.40431	-17.3196	9.26e-53	1.96e-50	109.26
DUSP5	-2.09907	7.21623	-17.2992	1.15e-52	2.42e-50	109.042
NOD1	-1.83854	4.5006	-17.2628	1.71e-52	3.53e-50	108.653
MT1F	2.56895	6.10201	17.2483	2e-52	4.08e-50	108.497
C16orf74	1.32988	2.20135	17.2378	2.23e-52	4.51e-50	108.386
ARNTL	-1.68889	4.79422	-17.2116	2.96e-52	5.92e-50	108.105
LGALS3	-1.96441	8.66284	-17.2019	3.29e-52	6.49e-50	108.002
SNAP25	-1.36536	1.97092	-17.182	4.07e-52	7.94e-50	107.789
FAM20C	-1.19008	5.25785	-17.1702	4.62e-52	8.91e-50	107.663
SLC5A8	2.6886	2.69223	17.0783	1.24e-51	2.37e-49	106.682
HLF	1.78066	2.98655	17.058	1.54e-51	2.91e-49	106.466
MAMLD1	-1.53916	3.23462	-17.0569	1.56e-51	2.91e-49	106.454
SLC35F2	-1.14484	5.07606	-17.0503	1.68e-51	3.09e-49	106.384
TMEM92	-1.87774	2.00831	-17.0234	2.24e-51	4.08e-49	106.097
FAM167A	2.50229	4.45815	17.0193	2.34e-51	4.22e-49	106.053
SPECC1	-0.853508	2.53366	-17.0006	2.86e-51	5.1e-49	105.855
FAM43A	-1.46204	5.25174	-16.9229	6.57e-51	1.16e-48	105.028
HMGA1	-1.27874	7.19994	-16.9152	7.13e-51	1.25e-48	104.945
MUC1	-2.42102	5.23826	-16.8788	1.05e-50	1.82e-48	104.559
EBF4	1.99433	4.15849	16.8461	1.49e-50	2.56e-48	104.211
ARHGAP24	1.44491	2.43432	16.7973	2.52e-50	4.27e-48	103.693
TMEM79	-1.23462	3.99662	-16.7398	4.66e-50	7.82e-48	103.082
MXRA8	-1.95891	7.53963	-16.7088	6.48e-50	1.08e-47	102.754
DOK7	-1.73115	2.94677	-16.7062	6.67e-50	1.1e-47	102.726
PERP	-1.26977	7.41502	-16.6758	9.22e-50	1.5e-47	102.403
LY6G6C	-1.81384	2.17935	-16.674	9.39e-50	1.52e-47	102.385
WNT4	1.64116	1.56319	16.6462	1.26e-49	2.02e-47	102.09
EBI3	-1.52425	3.28839	-16.6163	1.74e-49	2.76e-47	101.774
ALDH2	0.978376	4.62009	16.6094	1.87e-49	2.94e-47	101.701
LY6E	-1.64774	7.53602	-16.5753	2.69e-49	4.19e-47	101.34
SPOCK2	-2.36185	6.49766	-16.5697	2.86e-49	4.41e-47	101.28
ST6GALNAC5	-2.20254	2.34599	-16.5522	3.44e-49	5.26e-47	101.095
SFTPC	1.06179	0.74534	16.4954	6.3e-49	9.55e-47	100.494
CD55	-1.98837	6.87154	-16.4767	7.69e-49	1.15e-46	100.297
ITPR1	1.44086	2.42708	16.4673	8.5e-49	1.26e-46	100.198
SYTL5	-2.2895	3.48272	-16.4142	1.49e-48	2.2e-46	99.6374
HCN4	-1.06307	1.55885	-16.3992	1.75e-48	2.56e-46	99.4796
KRT19	-2.54059	7.9921	-16.3353	3.45e-48	5e-46	98.806
ENDOD1	-1.16241	6.28006	-16.3294	3.68e-48	5.29e-46	98.743
TPO	3.68099	6.40951	16.307	4.66e-48	6.64e-46	98.5074
MBOAT2	-1.2093	4.4007	-16.2996	5.04e-48	7.12e-46	98.4298
FHL1	2.01505	6.133	16.2955	5.26e-48	7.38e-46	98.3867
DHRS3	-1.43498	8.54712	-16.2714	6.8e-48	9.45e-46	98.1324
S100A6	-1.43999	12.4327	-16.2198	1.17e-47	1.62e-45	97.5898
DIO1	3.66793	4.47497	16.196	1.51e-47	2.07e-45	97.34
SORBS2	1.55706	4.34408	16.174	1.91e-47	2.59e-45	97.1085
BCO2	0.729303	0.89753	16.1697	1.99e-47	2.69e-45	97.0633
PLA2G2E	-1.16761	0.965685	-16.0984	4.24e-47	5.67e-45	96.3144
LLGL1	-0.993029	4.39215	-16.0955	4.37e-47	5.8e-45	96.2841
GALNT10	1.16731	4.2833	16.0867	4.8e-47	6.31e-45	96.1922
CDC42EP5	-1.36806	4.84038	-16.0807	5.11e-47	6.67e-45	96.1296
QSOX1	-1.18714	5.74823	-16.0693	5.77e-47	7.47e-45	96.0092
RASGEF1B	-0.991971	2.49022	-16.025	9.19e-47	1.18e-44	95.5459
PRSS22	-1.24922	4.13353	-16.0098	1.08e-46	1.38e-44	95.3865
SPHK1	-1.01023	3.90908	-15.9844	1.41e-46	1.78e-44	95.1199
CAPSL	1.7541	1.82611	15.9842	1.41e-46	1.78e-44	95.1179
COL8A2	-2.05788	5.83349	-15.9431	2.18e-46	2.72e-44	94.6877
TIMP1	-2.06397	10.0098	-15.9328	2.43e-46	3.01e-44	94.5808
BEAN1	-1.09985	1.85909	-15.8781	4.32e-46	5.31e-44	94.0088
SLC22A31	-2.73738	5.08442	-15.8656	4.93e-46	6.02e-44	93.8784
TMEM43	-0.952475	6.98258	-15.8429	6.26e-46	7.59e-44	93.6411
BASP1	-1.47059	6.58414	-15.8178	8.14e-46	9.8e-44	93.3797
C2CD4A	-2.04833	2.1527	-15.7832	1.17e-45	1.4e-43	93.0181
ICAM1	-1.66226	5.94054	-15.7828	1.18e-45	1.4e-43	93.0145
GRIN2C	2.01373	2.0887	15.7766	1.26e-45	1.48e-43	92.9496
MAP2	-1.26965	4.54936	-15.7721	1.32e-45	1.54e-43	92.9024
DSC2	-1.27752	2.9722	-15.7589	1.51e-45	1.76e-43	92.7648
PPM1L	1.18151	2.80369	15.744	1.77e-45	2.04e-43	92.6093
SIGLEC6	-2.32702	1.876	-15.7388	1.87e-45	2.14e-43	92.5554
IQGAP2	1.70362	3.69572	15.7277	2.1e-45	2.39e-43	92.4402
ALDH3B1	-1.3662	4.19559	-15.7223	2.22e-45	2.51e-43	92.3836
ETNK2	-1.29232	4.25149	-15.6917	3.06e-45	3.44e-43	92.065
NPPC	1.51964	1.23136	15.6776	3.55e-45	3.96e-43	91.9187
BCAS4	-0.976899	3.70763	-15.6583	4.34e-45	4.82e-43	91.7179
LAMB3	-2.6695	6.03694	-15.6425	5.12e-45	5.65e-43	91.5533
ICAM5	-1.84159	3.56926	-15.637	5.42e-45	5.91e-43	91.4967
TMEM38A	0.98808	2.33351	15.6368	5.44e-45	5.91e-43	91.4944
SEL1L3	-1.51524	5.58745	-15.6338	5.61e-45	6.06e-43	91.4636
CTXN1	-1.77233	5.19257	-15.5903	8.85e-45	9.5e-43	91.0108
MTMR11	-1.13851	3.20805	-15.5876	9.09e-45	9.7e-43	90.9837
KATNAL2	1.14132	2.18462	15.5159	1.92e-44	2.04e-42	90.2396
EPPK1	-1.08264	1.74826	-15.5001	2.27e-44	2.39e-42	90.0755
POU2F3	-0.991256	2.54422	-15.4935	2.43e-44	2.55e-42	90.0075
ITGB8	-1.49444	2.65596	-15.4898	2.53e-44	2.62e-42	89.9684
RUNX2	-1.48786	2.80184	-15.4896	2.53e-44	2.62e-42	89.9669
ALOX15B	-2.35213	4.89831	-15.4869	2.61e-44	2.68e-42	89.9384
GPAM	1.2784	3.19706	15.4831	2.71e-44	2.77e-42	89.8994
CYP46A1	0.436027	0.589421	15.4633	3.33e-44	3.38e-42	89.6948
AMOT	-1.19136	4.10169	-15.4286	4.79e-44	4.83e-42	89.3347
LDHD	1.38179	3.81964	15.4054	6.09e-44	6.11e-42	89.0955
NUCB2	0.857517	4.56016	15.3938	6.88e-44	6.86e-42	88.9751
NWD1	0.868642	0.63103	15.3921	7e-44	6.94e-42	88.9577
KCNIP3	1.25448	3.56351	15.3689	8.91e-44	8.79e-42	88.7176
TCF7L1	1.42017	3.58358	15.3438	1.16e-43	1.13e-41	88.4587
CLDN10	-2.49336	2.93619	-15.337	1.24e-43	1.21e-41	88.388
STRA6	-2.0136	3.01792	-15.3165	1.54e-43	1.49e-41	88.1764
WSCD2	2.20876	1.89825	15.2819	2.2e-43	2.12e-41	87.8193
AHNAK2	-1.80091	3.14146	-15.2462	3.19e-43	3.06e-41	87.4512
PPP1R1B	-1.78465	2.61989	-15.2345	3.6e-43	3.43e-41	87.3312
SULT1A2	0.644828	0.7904	15.229	3.81e-43	3.61e-41	87.2741
ATIC	-0.762817	6.09335	-15.2141	4.45e-43	4.2e-41	87.1204
GOLGA8M	1.37543	1.4219	15.2131	4.49e-43	4.21e-41	87.1109
UPP1	-1.21489	5.0859	-15.1922	5.59e-43	5.21e-41	86.895
GOLGA7B	-1.16978	2.16035	-15.1861	5.95e-43	5.52e-41	86.8325
DAPK2	-1.5773	6.25485	-15.154	8.29e-43	7.65e-41	86.5028
C16orf89	1.71772	8.2873	15.1407	9.52e-43	8.73e-41	86.3658
IL36RN	-0.874297	1.09171	-15.14	9.59e-43	8.75e-41	86.3588
PPL	-1.38764	6.89294	-15.1267	1.1e-42	9.98e-41	86.2223
C1orf116	-1.75653	4.9562	-15.1242	1.13e-42	1.02e-40	86.1961
SOD3	1.75522	5.86972	15.121	1.17e-42	1.05e-40	86.1637
LIPH	-2.09147	5.28299	-15.1021	1.42e-42	1.27e-40	85.9693
UNC5CL	-1.3245	2.75088	-15.0592	2.21e-42	1.97e-40	85.5284
KRT80	-1.72695	3.94404	-15.0499	2.44e-42	2.15e-40	85.4332
TMC6	-1.20019	4.99077	-15.0255	3.13e-42	2.76e-40	85.1827
INHBC	0.643022	0.556247	15.0103	3.67e-42	3.21e-40	85.0272
LEMD1	-1.53238	3.71322	-15.0057	3.84e-42	3.34e-40	84.9802
WASF3	1.03296	2.88112	15.0044	3.9e-42	3.37e-40	84.967
STXBP5L	1.28031	0.988561	14.9843	4.79e-42	4.13e-40	84.761
PLEKHA4	-1.52107	6.30011	-14.9694	5.59e-42	4.79e-40	84.6082
YBX3	-0.760681	5.8341	-14.9435	7.3e-42	6.23e-40	84.3431
ANKRD9	0.816197	2.62629	14.9272	8.64e-42	7.33e-40	84.1764
TMEM98	-1.19753	6.47035	-14.9164	9.65e-42	8.15e-40	84.0663
PROSER2	-0.857706	3.68466	-14.8843	1.34e-41	1.13e-39	83.7378
ACSF2	0.899606	5.21276	14.8197	2.61e-41	2.18e-39	83.0785
MMP15	1.05904	6.92597	14.8111	2.85e-41	2.37e-39	82.9914
SHROOM4	-1.20026	4.42353	-14.7989	3.23e-41	2.67e-39	82.867
SPX	1.5149	1.82738	14.794	3.4e-41	2.8e-39	82.8167
CLRN3	-0.560083	0.64538	-14.7925	3.45e-41	2.83e-39	82.8019
CELF4	-0.932661	1.61194	-14.7842	3.76e-41	3.07e-39	82.7165
BAIAP3	-1.63399	3.14981	-14.7692	4.38e-41	3.56e-39	82.5646
FCHO1	-1.10271	1.81586	-14.7553	5.05e-41	4.08e-39	82.4229
SLC24A3	1.18007	1.85277	14.75	5.34e-41	4.29e-39	82.3684
MT1H	3.34745	3.64603	14.7489	5.4e-41	4.32e-39	82.3571
SFN	-2.55422	4.95605	-14.7355	6.2e-41	4.94e-39	82.2206
RIMKLA	0.58952	0.60353	14.7285	6.65e-41	5.27e-39	82.1503
LCN2	-2.69732	5.11141	-14.7274	6.73e-41	5.31e-39	82.1387
LPAR5	-1.8456	5.73122	-14.7184	7.38e-41	5.79e-39	82.0476
FLRT1	1.47052	1.24462	14.7097	8.07e-41	6.31e-39	81.9586
RIMS2	-1.01086	1.41694	-14.7079	8.21e-41	6.39e-39	81.9406
TAGLN2	-0.890508	8.97062	-14.6807	1.09e-40	8.41e-39	81.6638
RNF157	0.772132	0.853471	14.6618	1.32e-40	1.02e-38	81.4715
KCTD17	-1.10255	3.9786	-14.6567	1.39e-40	1.07e-38	81.4196
IL1RAP	-1.42863	3.16674	-14.6499	1.49e-40	1.14e-38	81.3511
FOXQ1	-1.96021	5.71958	-14.6471	1.53e-40	1.16e-38	81.323
TGM1	-1.27311	2.39285	-14.6298	1.83e-40	1.38e-38	81.1474
TDGF1	0.535792	0.438424	14.6291	1.84e-40	1.39e-38	81.1398
CACNB2	0.561496	0.798295	14.6282	1.86e-40	1.4e-38	81.1302
DIRAS2	1.00805	1.05455	14.6128	2.17e-40	1.62e-38	80.9747
RASGRF1	-1.48122	1.86527	-14.5915	2.7e-40	2.01e-38	80.7587
IL17RD	-1.10062	2.34583	-14.57	3.37e-40	2.49e-38	80.5405
PI4K2A	-0.627847	5.39156	-14.549	4.17e-40	3.08e-38	80.3281
CACNB4	0.446542	0.341886	14.5391	4.62e-40	3.39e-38	80.2273
IRF5	-0.79049	3.43226	-14.5327	4.92e-40	3.6e-38	80.1631
ANXA1	-1.48929	9.49811	-14.5298	5.07e-40	3.69e-38	80.1336
PDE9A	-0.899939	4.36123	-14.5103	6.19e-40	4.49e-38	79.9358
PLXNC1	-1.54166	4.14584	-14.5028	6.68e-40	4.82e-38	79.8601
SOX4	-1.1861	6.52209	-14.4878	7.78e-40	5.59e-38	79.7091
SPATA24	0.633481	3.23284	14.4865	7.89e-40	5.65e-38	79.6951
CREB5	-1.19629	2.11316	-14.4752	8.84e-40	6.31e-38	79.5817
PTPRU	-1.37366	4.50584	-14.4602	1.03e-39	7.32e-38	79.4299
HMBS	0.724463	3.8507	14.4584	1.05e-39	7.42e-38	79.4115
PPARGC1A	1.53079	2.42903	14.4304	1.4e-39	9.83e-38	79.1287
CACNG4	-1.67259	1.82295	-14.4294	1.41e-39	9.89e-38	79.1185
ANXA2	-1.21096	7.25846	-14.4259	1.46e-39	1.02e-37	79.0831
THEMIS2	-1.10561	4.93106	-14.4258	1.46e-39	1.02e-37	79.0819
CDON	1.38564	2.42635	14.4131	1.66e-39	1.15e-37	78.954
BTBD11	1.44973	3.25262	14.4083	1.75e-39	1.21e-37	78.9056
BRINP1	-1.57492	2.46127	-14.363	2.77e-39	1.9e-37	78.4488
TSPAN33	1.26228	3.81331	14.3357	3.65e-39	2.5e-37	78.1739
ASPHD1	-1.30472	1.95799	-14.3117	4.66e-39	3.17e-37	77.933
RND3	-1.24584	3.79859	-14.2379	9.83e-39	6.67e-37	77.1912
GAP43	-2.37651	2.69138	-14.2366	9.97e-39	6.74e-37	77.1776
FAM240C	1.70806	2.5464	14.234	1.02e-38	6.89e-37	77.1516
LINGO2	1.12949	0.768787	14.2246	1.12e-38	7.54e-37	77.0577
CCL13	-1.96307	3.19149	-14.2133	1.26e-38	8.43e-37	76.9442
FGF12	1.07519	1.42225	14.2116	1.28e-38	8.54e-37	76.9269
KCNAB1	2.06003	3.45676	14.2033	1.39e-38	9.25e-37	76.8442
PALM3	-1.85941	4.97346	-14.2025	1.41e-38	9.29e-37	76.8355
TMEM184A	-1.07193	2.25478	-14.1996	1.45e-38	9.53e-37	76.8064
FBXO10	0.717191	2.47899	14.1986	1.46e-38	9.59e-37	76.7966
SH2D6	0.808175	0.701363	14.1971	1.49e-38	9.7e-37	76.7814
FAXC	-0.965066	2.29306	-14.1871	1.64e-38	1.07e-36	76.6814
ALOX5	-2.37277	4.9932	-14.1605	2.15e-38	1.39e-36	76.4149
CA5A	0.466501	0.444818	14.1579	2.21e-38	1.42e-36	76.3891
ITGA2	-1.61261	4.56643	-14.1503	2.38e-38	1.53e-36	76.313
DRAM1	-1.11163	4.44113	-14.1489	2.42e-38	1.55e-36	76.2991
PLRG1	-0.649142	5.69947	-14.1421	2.59e-38	1.65e-36	76.2309
ADGRV1	0.703011	0.645001	14.1361	2.75e-38	1.75e-36	76.1703
NPTXR	-1.0505	4.84343	-14.1353	2.77e-38	1.76e-36	76.1621
GABRB3	1.34895	1.55008	14.1212	3.19e-38	2.02e-36	76.0219
ENPP3	1.45284	1.15636	14.1059	3.73e-38	2.34e-36	75.8681
SPINT1	-0.883735	7.85238	-14.0889	4.43e-38	2.77e-36	75.6983
RASD2	-1.47558	4.15369	-14.0822	4.73e-38	2.95e-36	75.6318
PLCD4	0.622315	0.468037	14.0713	5.29e-38	3.29e-36	75.5222
SGMS2	-1.3151	4.94511	-14.0691	5.4e-38	3.35e-36	75.5004
TNFRSF12A	-1.49654	7.89042	-14.0667	5.53e-38	3.41e-36	75.4767
LOX	-1.57561	3.2217	-14.0603	5.9e-38	3.63e-36	75.4124
INAFM2	0.954665	5.43226	14.0475	6.71e-38	4.11e-36	75.2851
CSF2	-1.46194	2.13971	-14.0385	7.35e-38	4.49e-36	75.1948
GSN	-1.08315	8.53622	-14.0202	8.83e-38	5.37e-36	75.0126
TMEM163	-1.90803	2.98825	-14.0153	9.28e-38	5.62e-36	74.9634
TECTB	0.502248	0.271995	14.0125	9.54e-38	5.76e-36	74.936
TEKT4	0.786077	0.596167	13.9896	1.2e-37	7.23e-36	74.7071
COMP	-2.55099	4.18357	-13.97	1.46e-37	8.77e-36	74.512
PRKACB	1.01794	4.15431	13.9525	1.74e-37	1.04e-35	74.338
MVP	-0.889947	6.98013	-13.9513	1.76e-37	1.05e-35	74.3263
RCAN2	1.20522	4.02265	13.9497	1.79e-37	1.06e-35	74.3097
MCRIP2	0.802275	4.03876	13.9449	1.88e-37	1.11e-35	74.2621
MST1R	-1.12148	3.05262	-13.9391	1.99e-37	1.17e-35	74.2046
C2CD4B	-1.53097	2.36516	-13.9077	2.73e-37	1.6e-35	73.8923
PGF	1.58669	4.88738	13.9005	2.94e-37	1.72e-35	73.8209
SLC39A11	0.785852	4.70969	13.8818	3.54e-37	2.06e-35	73.6352
PRKG1	0.962648	1.72628	13.8732	3.86e-37	2.24e-35	73.5497
SULT2B1	-1.22557	2.3994	-13.8706	3.96e-37	2.29e-35	73.5237
ARMCX3	-1.45823	7.68921	-13.8634	4.26e-37	2.46e-35	73.4525
CBR3	-0.814153	2.23562	-13.8211	6.5e-37	3.74e-35	73.0321
RNF144A	-0.963189	3.70026	-13.8198	6.58e-37	3.77e-35	73.0195
DPP4	-1.92219	4.58824	-13.8041	7.7e-37	4.4e-35	72.8644
PYGM	1.31884	1.74221	13.8014	7.91e-37	4.5e-35	72.8373
NETO2	0.831223	1.82593	13.7887	8.98e-37	5.09e-35	72.7119
TMCC3	-1.11836	5.12353	-13.7642	1.15e-36	6.48e-35	72.469
TIMM17B	0.647293	4.97036	13.7596	1.2e-36	6.77e-35	72.4234
KIAA1217	-1.07085	6.4988	-13.7401	1.46e-36	8.19e-35	72.2307
TPD52L1	-0.973191	5.60796	-13.7392	1.47e-36	8.24e-35	72.222
NIM1K	0.639895	0.681066	13.7259	1.68e-36	9.38e-35	72.09
SLC25A33	0.736892	2.45869	13.7203	1.78e-36	9.88e-35	72.0345
LDLR	-1.43789	3.28144	-13.7193	1.79e-36	9.94e-35	72.0252
VASN	-1.06382	6.97127	-13.6917	2.36e-36	1.3e-34	71.7525
COL8A1	-1.14657	6.63305	-13.6876	2.46e-36	1.35e-34	71.7122
GRHL3	-1.24922	2.26096	-13.6676	3e-36	1.65e-34	71.5146
DMBX1	-1.40048	1.21519	-13.6457	3.73e-36	2.04e-34	71.2987
ADIG	1.18402	1.03968	13.6381	4.02e-36	2.19e-34	71.2236
RIPOR3	0.829533	1.1223	13.624	4.63e-36	2.52e-34	71.0847
SDF2L1	1.16524	6.58581	13.6109	5.27e-36	2.86e-34	70.9561
MGAT4B	-0.762249	6.65916	-13.6046	5.61e-36	3.03e-34	70.8937
GALE	-1.24734	5.7071	-13.5932	6.28e-36	3.38e-34	70.7811
VWA5A	-0.697172	4.36889	-13.5588	8.83e-36	4.74e-34	70.4435
PLEKHG4	-1.07313	3.22837	-13.5565	9.04e-36	4.84e-34	70.4208
CHI3L1	-3.12609	6.68146	-13.5558	9.1e-36	4.85e-34	70.414
GSTM3	1.24371	4.22975	13.5487	9.76e-36	5.19e-34	70.3439
MID1	0.716894	2.07955	13.5456	1.01e-35	5.34e-34	70.3131
CCDC110	0.739537	1.67283	13.5366	1.1e-35	5.82e-34	70.2248
IGSF9	-0.99739	2.60002	-13.5346	1.12e-35	5.91e-34	70.2057
SLC29A4	1.26553	2.06681	13.5293	1.18e-35	6.22e-34	70.1531
TMEM117	-0.722068	3.49848	-13.526	1.22e-35	6.4e-34	70.1207
CIB4	1.42074	1.15762	13.5155	1.36e-35	7.08e-34	70.0177
PTPRF	-1.05085	6.77422	-13.5057	1.49e-35	7.78e-34	69.9215
ELAPOR1	1.62949	1.72324	13.4916	1.72e-35	8.9e-34	69.7833
SNTA1	0.898922	7.13207	13.4915	1.72e-35	8.9e-34	69.782
IER5L	-1.13119	3.79761	-13.482	1.89e-35	9.75e-34	69.6888
TCAF2	0.706679	1.04494	13.4816	1.9e-35	9.75e-34	69.6856
INF2	-1.01993	4.98242	-13.4505	2.58e-35	1.32e-33	69.3808
IGFBPL1	1.74553	2.76846	13.4393	2.88e-35	1.47e-33	69.2706
FBXO16	0.614419	2.17068	13.4387	2.9e-35	1.48e-33	69.2655
CXCL16	-0.76662	5.99814	-13.4351	3e-35	1.52e-33	69.2299
IFIT5	-0.839486	4.75192	-13.4325	3.08e-35	1.56e-33	69.2039
HLA-G	-1.85812	3.85201	-13.4214	3.44e-35	1.73e-33	69.096
ARHGAP10	-0.609939	3.03241	-13.4035	4.1e-35	2.06e-33	68.9206
EPHX3	-1.02221	1.58274	-13.3659	5.94e-35	2.98e-33	68.5531
ETNPPL	0.974518	0.568911	13.3619	6.17e-35	3.08e-33	68.5146
BCAP29	0.322309	0.56035	13.3618	6.18e-35	3.08e-33	68.5134
RIN1	-0.876249	2.41288	-13.3456	7.25e-35	3.61e-33	68.3549
RNF183	-1.08389	1.3406	-13.3375	7.85e-35	3.9e-33	68.2757
MAPK4	1.17551	1.06576	13.3356	8e-35	3.95e-33	68.258
S100A11	-0.852011	10.5897	-13.3254	8.84e-35	4.36e-33	68.1583
KCNQ1	0.810367	6.31442	13.3176	9.55e-35	4.7e-33	68.0816
GPR153	-0.992926	2.40225	-13.2973	1.16e-34	5.71e-33	67.8846
CDH22	-1.15153	1.62942	-13.2929	1.22e-34	5.95e-33	67.8409
MSI1	1.31897	1.34552	13.2861	1.3e-34	6.35e-33	67.7747
RBBP8NL	1.01392	2.85306	13.2844	1.32e-34	6.43e-33	67.7581
ESPN	-1.34362	1.70647	-13.2821	1.35e-34	6.56e-33	67.7359
ACACB	0.836042	2.81283	13.2766	1.43e-34	6.9e-33	67.6827
TTL	-0.509849	2.90922	-13.2654	1.59e-34	7.68e-33	67.5738
C16orf71	0.48236	0.813024	13.2544	1.78e-34	8.54e-33	67.4664
ANXA3	-1.36344	5.56257	-13.2502	1.85e-34	8.87e-33	67.426
CTSC	-1.31623	4.92162	-13.2464	1.92e-34	9.18e-33	67.3885
CATSPER1	-1.23867	1.93028	-13.2432	1.98e-34	9.44e-33	67.3579
DEPDC1B	-1.46992	2.62492	-13.239	2.06e-34	9.81e-33	67.3168
NXN	-1.11495	4.87335	-13.2297	2.26e-34	1.07e-32	67.2263
FZD8	0.878113	3.27086	13.2255	2.36e-34	1.11e-32	67.1861
SLC25A15	1.2622	3.71754	13.2155	2.6e-34	1.23e-32	67.0882
ABCC8	1.23755	1.05497	13.2053	2.87e-34	1.35e-32	66.9895
LYN	-0.747795	5.12504	-13.2019	2.97e-34	1.39e-32	66.9562
SLC1A5	-1.26713	4.71716	-13.2013	2.99e-34	1.4e-32	66.9506
ZNF431	-0.918042	3.66778	-13.2005	3.01e-34	1.4e-32	66.9428
GABRA6	-0.198558	0.179601	-13.1954	3.16e-34	1.47e-32	66.8933
IFTAP	0.850887	2.26084	13.1677	4.15e-34	1.92e-32	66.625
DPY19L2	1.04665	2.2439	13.161	4.43e-34	2.05e-32	66.56
TRIM47	-0.661263	5.23216	-13.1594	4.5e-34	2.07e-32	66.5441
SLC7A4	-0.626809	0.867916	-13.1548	4.71e-34	2.16e-32	66.4998
IL23A	-0.755326	2.31876	-13.1478	5.04e-34	2.31e-32	66.4315
LRG1	-1.61845	3.45003	-13.1454	5.16e-34	2.36e-32	66.4088
CXXC4	1.1794	2.22382	13.1201	6.61e-34	3.01e-32	66.1634
KLK6	-1.63241	1.42373	-13.1157	6.9e-34	3.14e-32	66.1206
CACNA2D3	0.855323	1.19964	13.1149	6.95e-34	3.15e-32	66.1126
MARCO	-1.94978	3.39293	-13.1121	7.14e-34	3.23e-32	66.0858
ZNF430	-1.00155	3.71803	-13.094	8.52e-34	3.84e-32	65.911
MLEC	0.765364	6.94105	13.0935	8.56e-34	3.85e-32	65.9062
TBC1D30	0.302792	0.500261	13.0889	8.96e-34	4.02e-32	65.8617
HRH1	-1.14388	2.87255	-13.0745	1.03e-33	4.61e-32	65.7224
SNRNP25	0.696772	5.04719	13.072	1.06e-33	4.72e-32	65.698
CDC42EP1	-0.921785	6.63851	-13.0604	1.18e-33	5.26e-32	65.5864
ZNF536	0.706768	0.438637	13.0539	1.26e-33	5.6e-32	65.5231
SLC27A4	1.02352	4.98509	13.0413	1.42e-33	6.31e-32	65.4016
SLC6A12	-1.03278	3.45633	-13.0149	1.84e-33	8.13e-32	65.147
RDH5	-1.06474	1.93271	-13.0115	1.9e-33	8.39e-32	65.1139
ADAM22	0.741502	1.24241	12.9986	2.16e-33	9.48e-32	64.9896
JAK3	-1.22711	3.03778	-12.9949	2.24e-33	9.81e-32	64.9538
KY	0.944889	1.471	12.9581	3.2e-33	1.4e-31	64.6002
CD109	-1.39856	2.94394	-12.9393	3.84e-33	1.67e-31	64.4191
PC	-0.997869	4.83399	-12.9392	3.84e-33	1.67e-31	64.4184
MIOX	1.5075	2.71165	12.9381	3.88e-33	1.68e-31	64.4071
IL1RN	-1.45223	3.61614	-12.9372	3.91e-33	1.69e-31	64.3988
MAP1LC3A	0.893172	5.52931	12.9149	4.86e-33	2.1e-31	64.184
TMPRSS11E	-1.61477	1.54707	-12.9135	4.93e-33	2.12e-31	64.1705
GRAMD1B	0.876591	2.10317	12.8928	6.02e-33	2.58e-31	63.9726
TMSB10	-0.956751	12.3893	-12.8905	6.15e-33	2.64e-31	63.9505
FLNA	-0.985282	7.86649	-12.8746	7.18e-33	3.07e-31	63.7976
MICAL2	-1.0237	3.1362	-12.8744	7.19e-33	3.07e-31	63.7957
CCDC178	0.509224	0.4801	12.8706	7.46e-33	3.17e-31	63.7592
KCNK16	1.34149	0.787581	12.8697	7.53e-33	3.19e-31	63.7504
CDH3	-1.64965	5.5679	-12.8515	8.98e-33	3.8e-31	63.5759
GRM4	-1.08838	1.09479	-12.8454	9.52e-33	4.02e-31	63.5175
CST5	-1.54246	1.66694	-12.8452	9.54e-33	4.02e-31	63.5153
GNAI1	0.788075	1.89349	12.8442	9.63e-33	4.05e-31	63.5058
PDE8B	1.31041	5.4549	12.8124	1.31e-32	5.49e-31	63.2012
MDK	-1.5487	7.63904	-12.7943	1.56e-32	6.52e-31	63.028
ENKUR	0.427175	0.532122	12.7909	1.61e-32	6.72e-31	62.9957
HPSE	-0.934029	2.1752	-12.7841	1.72e-32	7.15e-31	62.9308
QRICH2	0.761309	1.81562	12.7837	1.73e-32	7.17e-31	62.9268
GOLGA8N	0.66627	1.15191	12.7828	1.74e-32	7.2e-31	62.9182
CORO2B	1.06406	2.29456	12.7827	1.74e-32	7.2e-31	62.9178
DRAXIN	-0.763301	1.2494	-12.7725	1.92e-32	7.92e-31	62.8204
GJB4	-0.950709	1.04518	-12.7671	2.03e-32	8.33e-31	62.768
MFGE8	-1.21643	6.79696	-12.7558	2.26e-32	9.26e-31	62.6602
SYNE1	1.00698	2.66008	12.752	2.34e-32	9.58e-31	62.6246
MLXIPL	-1.24019	2.86908	-12.7388	2.66e-32	1.09e-30	62.4983
RYR1	-1.11634	2.86764	-12.7376	2.69e-32	1.1e-30	62.4864
SMIM3	-0.775113	5.31745	-12.7202	3.18e-32	1.29e-30	62.3213
DCLK2	0.84478	2.64745	12.7186	3.23e-32	1.31e-30	62.3052
PRICKLE1	-1.10332	3.46793	-12.7137	3.39e-32	1.37e-30	62.2585
AGMAT	0.609373	1.50347	12.71	3.51e-32	1.41e-30	62.2239
CD58	-0.59755	4.68433	-12.7056	3.66e-32	1.47e-30	62.1813
TFCP2L1	1.63503	2.7228	12.7053	3.67e-32	1.47e-30	62.1785
PERCC1	0.965388	0.839275	12.7028	3.76e-32	1.51e-30	62.1548
AQP4	1.63107	2.90777	12.6992	3.89e-32	1.55e-30	62.1207
GCSH	0.564129	1.5431	12.6971	3.97e-32	1.58e-30	62.1007
NMU	-2.49155	3.93878	-12.695	4.05e-32	1.61e-30	62.0809
MAP2K6	0.617788	1.09915	12.6893	4.28e-32	1.7e-30	62.0267
LRFN1	0.591909	1.01757	12.678	4.77e-32	1.89e-30	61.9186
C4orf19	0.575998	0.830345	12.6733	4.99e-32	1.97e-30	61.8742
INAVA	-1.20638	1.46996	-12.6409	6.81e-32	2.68e-30	61.5659
FAM155B	1.82514	3.78547	12.6375	7.04e-32	2.76e-30	61.5339
NPC1	-0.738729	3.58037	-12.6339	7.29e-32	2.86e-30	61.4996
ME1	0.976606	3.03652	12.6217	8.19e-32	3.2e-30	61.3835
CLU	-1.71438	11.3352	-12.6131	8.89e-32	3.47e-30	61.3018
TUBB6	-0.798717	5.60232	-12.6069	9.44e-32	3.67e-30	61.2432
SLC25A45	0.662999	2.94258	12.6067	9.45e-32	3.67e-30	61.2415
MSRB2	0.626343	5.62875	12.5991	1.02e-31	3.94e-30	61.1692
IL1RL1	-2.34587	2.86558	-12.5873	1.14e-31	4.4e-30	61.0566
SRGAP3	-0.642343	2.32365	-12.574	1.29e-31	4.98e-30	60.9313
TFF3	2.81208	5.25609	12.5651	1.41e-31	5.42e-30	60.8466
NAB2	-1.07823	7.14993	-12.5599	1.48e-31	5.67e-30	60.7969
MUC21	-2.08747	2.77489	-12.5599	1.48e-31	5.67e-30	60.7969
MAP3K6	-0.613679	4.82278	-12.5559	1.54e-31	5.87e-30	60.7596
ARHGAP22	0.77266	2.70932	12.5415	1.76e-31	6.73e-30	60.6228
DEPTOR	1.25665	5.622	12.5265	2.04e-31	7.75e-30	60.4808
GALNT17	1.4137	3.14876	12.5241	2.08e-31	7.91e-30	60.4581
SCEL	-1.78435	5.10108	-12.5232	2.1e-31	7.95e-30	60.45
RNF150	0.975208	1.79071	12.511	2.36e-31	8.92e-30	60.3341
ADTRP	-1.4198	2.1573	-12.5094	2.4e-31	9.04e-30	60.3191
COPZ2	0.902283	4.52354	12.5019	2.57e-31	9.68e-30	60.2488
P2RY6	-1.09194	2.54048	-12.4951	2.75e-31	1.03e-29	60.1842
TINCR	-1.22676	1.22939	-12.494	2.77e-31	1.04e-29	60.1741
IGFL2	-1.8887	2.43761	-12.4743	3.35e-31	1.25e-29	59.9876
PRRT4	1.16425	0.786885	12.4668	3.59e-31	1.34e-29	59.9173
KLF8	-0.656654	2.29506	-12.4638	3.7e-31	1.38e-29	59.8889
PIR	0.914861	3.45805	12.4533	4.09e-31	1.52e-29	59.7892
MSN	-0.735567	8.97789	-12.4514	4.17e-31	1.54e-29	59.7713
OSMR	-1.07116	3.9846	-12.4453	4.41e-31	1.63e-29	59.714
ADAMTS3	0.584101	1.2916	12.4449	4.43e-31	1.63e-29	59.7101
FAM111A	-0.754657	4.86103	-12.4417	4.57e-31	1.68e-29	59.6803
BHLHE41	-1.15079	7.74569	-12.4331	4.95e-31	1.82e-29	59.5993
RARG	-0.721257	5.28471	-12.423	5.46e-31	2e-29	59.5037
QDPR	0.595265	4.85637	12.4172	5.76e-31	2.11e-29	59.4494
MDFIC	-0.84841	5.70933	-12.4105	6.14e-31	2.24e-29	59.3859
CDC42BPG	-0.731512	5.01496	-12.4093	6.22e-31	2.26e-29	59.3744
TNFRSF21	-1.23656	4.98061	-12.4029	6.6e-31	2.4e-29	59.3143
SLC26A7	2.0364	5.73224	12.3943	7.17e-31	2.6e-29	59.2332
IRX6	1.22489	0.78052	12.3913	7.37e-31	2.67e-29	59.2055
SRPRB	0.570819	5.15031	12.3858	7.77e-31	2.8e-29	59.1537
SH3BGRL3	-0.638358	8.71914	-12.383	7.98e-31	2.87e-29	59.1273
QPCT	-1.61896	6.14104	-12.3818	8.07e-31	2.9e-29	59.1158
PHLDB2	-0.917018	2.87321	-12.3807	8.15e-31	2.92e-29	59.1054
MPZL2	-1.07857	7.39328	-12.3747	8.63e-31	3.09e-29	59.0495
RAMP1	-1.85054	3.90128	-12.3661	9.36e-31	3.34e-29	58.9686
CLDN4	-0.880418	8.3828	-12.3538	1.05e-30	3.75e-29	58.8531
VGLL1	-1.40026	1.55733	-12.3486	1.1e-30	3.93e-29	58.8045
MCUB	-1.05036	3.60547	-12.3468	1.12e-30	3.99e-29	58.7872
PLCH1	1.02266	1.59971	12.3416	1.18e-30	4.18e-29	58.7384
SEMA3D	1.93696	1.82728	12.3382	1.22e-30	4.31e-29	58.7066
SAMD5	0.920728	1.16263	12.3309	1.31e-30	4.61e-29	58.638
OR4D10	-0.75536	0.746136	-12.3268	1.36e-30	4.78e-29	58.5991
BFSP1	0.841029	2.14867	12.3233	1.4e-30	4.93e-29	58.5667
FAAH	0.729481	5.54561	12.3229	1.41e-30	4.94e-29	58.5631
ANKRD46	0.653486	3.53709	12.3219	1.42e-30	4.97e-29	58.5531
ZNF100	-0.801341	2.90014	-12.3218	1.42e-30	4.97e-29	58.5529
PRADC1	0.621222	5.03922	12.3176	1.48e-30	5.17e-29	58.5127
SYNM	0.861338	2.50973	12.3153	1.51e-30	5.27e-29	58.4916
ALOX5AP	-1.31311	4.57093	-12.3006	1.74e-30	6.04e-29	58.3541
IGFBP6	-2.09751	7.83846	-12.2972	1.8e-30	6.22e-29	58.3223
SCARB1	0.742294	3.65619	12.2967	1.81e-30	6.24e-29	58.3169
C1QL1	-1.60406	2.57809	-12.2964	1.81e-30	6.25e-29	58.314
ARRDC2	-0.757395	5.7314	-12.2946	1.84e-30	6.33e-29	58.2976
BMP8A	2.38459	3.24608	12.2946	1.84e-30	6.33e-29	58.2971
SLC2A4RG	0.560637	5.9559	12.2935	1.86e-30	6.38e-29	58.2869
VDAC3	0.515814	6.11972	12.2662	2.41e-30	8.24e-29	58.0319
RGS9	0.569434	1.17776	12.2557	2.66e-30	9.09e-29	57.9328
SFXN3	-0.611843	5.10766	-12.245	2.94e-30	1e-28	57.8331
ARL14EPL	-0.454096	0.481654	-12.236	3.2e-30	1.09e-28	57.7489
RAD23B	-0.779513	7.62779	-12.2355	3.22e-30	1.09e-28	57.7441
CYB561	0.744789	5.76598	12.233	3.3e-30	1.12e-28	57.7208
GBP2	-1.27251	4.96516	-12.2158	3.87e-30	1.31e-28	57.5605
SLC22A23	0.608964	1.65523	12.2143	3.93e-30	1.33e-28	57.5461
EFCC1	0.907628	2.12873	12.2133	3.97e-30	1.34e-28	57.5371
CDH11	-1.45875	2.55242	-12.2079	4.18e-30	1.4e-28	57.4866
INMT	-2.1102	4.54028	-12.2056	4.27e-30	1.43e-28	57.4652
CD47	-0.807416	6.28956	-12.2048	4.3e-30	1.44e-28	57.4577
SOWAHB	-0.817647	3.90092	-12.1994	4.52e-30	1.51e-28	57.4072
ARHGAP23	-0.902561	4.4957	-12.1985	4.56e-30	1.52e-28	57.3992
MAP3K5	-1.02328	5.5592	-12.1833	5.26e-30	1.75e-28	57.2572
EMP2	-0.852784	4.80049	-12.1786	5.5e-30	1.83e-28	57.213
CFI	-1.06199	3.20916	-12.1777	5.55e-30	1.84e-28	57.2051
SLC25A47	0.652691	0.508229	12.1772	5.57e-30	1.84e-28	57.2006
SIRT4	0.627991	2.16374	12.1736	5.77e-30	1.9e-28	57.1663
S100A10	-1.46932	8.21967	-12.1689	6.03e-30	1.99e-28	57.1228
ENTPD2	-1.47796	2.43654	-12.1624	6.41e-30	2.11e-28	57.0623
SEC14L2	-0.874788	3.63332	-12.1615	6.46e-30	2.12e-28	57.0534
PHYHIP	-1.27244	4.17465	-12.1511	7.12e-30	2.33e-28	56.9569
RBM20	0.568983	0.806482	12.1399	7.91e-30	2.59e-28	56.8531
TIPARP	-1.18013	5.88964	-12.1312	8.59e-30	2.8e-28	56.7714
IPCEF1	1.38949	2.19481	12.131	8.6e-30	2.8e-28	56.77
SDK1	-1.49691	2.63192	-12.1283	8.83e-30	2.87e-28	56.7447
SHANK2	0.855438	1.80633	12.1253	9.08e-30	2.95e-28	56.7165
ADCY8	-1.69734	1.90979	-12.1137	1.01e-29	3.28e-28	56.6092
SCNN1A	-1.64071	6.25387	-12.1082	1.07e-29	3.44e-28	56.558
SPOCD1	-0.721937	0.83465	-12.0963	1.19e-29	3.84e-28	56.4474
FAM95C	0.549742	0.607356	12.093	1.23e-29	3.96e-28	56.4167
CLDN16	-2.19635	5.64232	-12.0921	1.24e-29	3.98e-28	56.4084
PRICKLE2	0.617923	2.32902	12.0919	1.24e-29	3.98e-28	56.4064
DGLUCY	0.478655	4.49829	12.0884	1.28e-29	4.11e-28	56.3741
SLC26A4	2.11031	5.72572	12.0861	1.31e-29	4.19e-28	56.3524
C3	-2.00033	6.70014	-12.0839	1.34e-29	4.27e-28	56.3318
L3MBTL4	0.645059	1.68654	12.0838	1.34e-29	4.27e-28	56.3308
CDCP1	-0.883723	4.99324	-12.0811	1.37e-29	4.36e-28	56.3065
CCDC167	0.645181	5.14965	12.0757	1.44e-29	4.58e-28	56.2564
SLC2A4	0.932431	1.65927	12.0728	1.49e-29	4.7e-28	56.229
SUSD4	-1.01204	2.70863	-12.0716	1.5e-29	4.74e-28	56.2178
GCK	0.529936	0.437511	12.0715	1.5e-29	4.74e-28	56.2174
NDRG2	0.716379	4.53192	12.0686	1.54e-29	4.86e-28	56.1906
IRS1	1.14218	4.36233	12.0672	1.56e-29	4.91e-28	56.1776
LRRC45	0.562391	3.66467	12.0668	1.57e-29	4.92e-28	56.1738
MYT1	0.536985	0.91622	12.0663	1.58e-29	4.94e-28	56.1692
PNP	-1.36625	4.80344	-12.0513	1.82e-29	5.67e-28	56.0301
PIP	0.83842	0.497521	12.0505	1.83e-29	5.71e-28	56.0219
MTARC2	0.876134	4.90643	12.0398	2.02e-29	6.29e-28	55.9236
CORO2A	-0.967729	3.84023	-12.0396	2.03e-29	6.29e-28	55.9216
SERTAD2	-0.69146	4.8604	-12.0302	2.21e-29	6.86e-28	55.8345
DOCK9	-0.945054	5.91815	-12.0282	2.25e-29	6.98e-28	55.816
CETP	1.0117	2.15638	12.028	2.26e-29	6.98e-28	55.814
FAM124A	0.679132	1.0886	12.0246	2.33e-29	7.19e-28	55.7827
SCD	-1.21756	3.85768	-12.0135	2.59e-29	7.96e-28	55.6795
MEDAG	-1.31098	4.24445	-12.0117	2.63e-29	8.08e-28	55.6632
MROH6	-1.08066	3.11156	-12.0108	2.65e-29	8.13e-28	55.6548
SGMS1	-0.801591	5.19277	-12.0106	2.66e-29	8.14e-28	55.6525
ZNF581	-0.584023	5.79088	-12.0096	2.68e-29	8.2e-28	55.6434
TNNI1	-0.673804	1.61923	-12.0049	2.8e-29	8.55e-28	55.5997
TMEM164	0.731161	4.08776	12.0011	2.9e-29	8.84e-28	55.5652
CGNL1	1.28337	4.8436	11.995	3.07e-29	9.34e-28	55.5086
RTKN	-0.552039	4.89152	-11.9889	3.25e-29	9.87e-28	55.4523
ANKEF1	0.701612	2.86587	11.9886	3.26e-29	9.88e-28	55.4493
TRIM58	1.27109	3.62112	11.9852	3.37e-29	1.02e-27	55.4178
INHBB	-1.47165	6.75007	-11.9839	3.41e-29	1.03e-27	55.4063
CDC42EP3	-0.964504	4.16	-11.9764	3.66e-29	1.1e-27	55.3362
DUSP15	0.857674	2.10266	11.9714	3.83e-29	1.15e-27	55.2906
CEP170B	-0.642406	5.62874	-11.9691	3.91e-29	1.17e-27	55.2693
CCNI2	-0.414824	1.07043	-11.9608	4.23e-29	1.27e-27	55.192
FCGBP	1.27705	6.54576	11.9596	4.27e-29	1.28e-27	55.1815
PPP1R13L	-0.658624	4.74988	-11.9419	5.04e-29	1.51e-27	55.0176
TBC1D4	0.944966	3.77583	11.9343	5.41e-29	1.61e-27	54.9482
SLC16A2	1.20922	4.31077	11.9267	5.8e-29	1.73e-27	54.8782
PKHD1L1	1.96442	2.01138	11.9234	5.99e-29	1.78e-27	54.847
NRP2	-1.20637	5.17065	-11.9153	6.46e-29	1.92e-27	54.7728
STK17B	-1.05771	3.56757	-11.9132	6.58e-29	1.95e-27	54.7533
MACIR	0.720074	3.18717	11.9116	6.68e-29	1.98e-27	54.7388
LYNX1	-0.89182	4.26242	-11.9029	7.24e-29	2.14e-27	54.6587
KLHL23	0.752067	3.07991	11.9016	7.33e-29	2.16e-27	54.6466
LMNTD1	0.322271	0.174765	11.8983	7.56e-29	2.22e-27	54.6162
GRAMD2B	-0.961783	5.85122	-11.8841	8.63e-29	2.53e-27	54.4855
B4GALNT3	-0.9945	3.82963	-11.8836	8.66e-29	2.54e-27	54.4813
MYO1G	-1.6275	3.23274	-11.8686	9.96e-29	2.91e-27	54.3431
PIK3R3	0.791487	4.05635	11.8683	9.99e-29	2.92e-27	54.3398
IRS2	-0.862789	4.12577	-11.8675	1.01e-28	2.93e-27	54.333
KLK11	-2.51349	2.90092	-11.8649	1.03e-28	3e-27	54.309
CCL20	-1.28389	1.69292	-11.8614	1.06e-28	3.09e-27	54.2772
GPRC5B	-0.804719	5.53772	-11.8611	1.07e-28	3.1e-27	54.2743
BNIPL	-1.21946	3.88167	-11.8577	1.1e-28	3.19e-27	54.2425
KANK2	-0.685003	5.97672	-11.8544	1.14e-28	3.28e-27	54.2129
MSMO1	-0.645803	5.86803	-11.8507	1.18e-28	3.4e-27	54.1781
LIN7A	0.803624	1.70077	11.8444	1.25e-28	3.59e-27	54.1206
CFH	-1.53491	4.99232	-11.8347	1.36e-28	3.92e-27	54.0314
HLA-B	-0.996811	10.5126	-11.8313	1.41e-28	4.04e-27	54.0003
CRELD2	0.860497	4.83507	11.8293	1.43e-28	4.11e-27	53.9822
AXL	-0.800306	4.82775	-11.8275	1.46e-28	4.17e-27	53.9653
TM4SF4	-1.78289	2.67423	-11.8246	1.5e-28	4.28e-27	53.9389
CYSLTR2	-1.76519	4.00483	-11.8222	1.53e-28	4.37e-27	53.9171
PLEKHJ1	0.661321	4.69765	11.8144	1.65e-28	4.69e-27	53.845
SCARA3	-1.65206	6.63431	-11.8051	1.79e-28	5.1e-27	53.7598
MAFF	-1.01642	4.09735	-11.801	1.86e-28	5.29e-27	53.7224
ADM2	1.2685	3.63328	11.7961	1.95e-28	5.52e-27	53.6777
COL23A1	1.63706	4.80147	11.7894	2.07e-28	5.87e-27	53.6163
SYNDIG1L	-0.926627	1.93498	-11.7834	2.19e-28	6.19e-27	53.5614
MMEL1	0.658795	0.424839	11.7808	2.25e-28	6.33e-27	53.5372
TBX22	0.974138	0.829024	11.7757	2.36e-28	6.63e-27	53.4904
FAM171B	0.991407	2.06348	11.7622	2.67e-28	7.49e-27	53.3674
KIF6	0.366081	0.527732	11.7592	2.74e-28	7.69e-27	53.3393
LENG9	-0.744049	2.53711	-11.752	2.93e-28	8.21e-27	53.2737
VAT1	-0.518782	7.83915	-11.7321	3.52e-28	9.84e-27	53.0923
DNTT	0.434507	0.260896	11.7312	3.55e-28	9.91e-27	53.0837
C5orf47	0.173129	0.152065	11.7184	4e-28	1.11e-26	52.9669
ETV2	0.409194	1.06765	11.7122	4.23e-28	1.18e-26	52.91
SLC26A3	0.422947	0.288745	11.7078	4.41e-28	1.22e-26	52.8702
LAMP5	-1.99924	3.41148	-11.7041	4.56e-28	1.26e-26	52.8368
DCXR	0.74572	6.04415	11.7041	4.56e-28	1.26e-26	52.8361
SLC25A42	0.77895	4.90363	11.7036	4.58e-28	1.26e-26	52.8322
PSMB8	-0.691094	6.13869	-11.6991	4.78e-28	1.32e-26	52.7904
TMSB4X	-0.966764	10.7961	-11.684	5.48e-28	1.51e-26	52.6533
ACVR1	-0.79194	6.42806	-11.6822	5.58e-28	1.53e-26	52.6366
RAVER2	0.53993	2.84446	11.6808	5.65e-28	1.55e-26	52.6243
NPC2	-0.921895	10.5974	-11.6793	5.73e-28	1.57e-26	52.61
SLC15A2	0.995194	2.98136	11.6775	5.82e-28	1.59e-26	52.5936
RANBP3L	0.769157	1.20498	11.6718	6.13e-28	1.68e-26	52.5423
SPATS2L	-0.711357	4.85468	-11.6697	6.26e-28	1.71e-26	52.5224
APBA2	0.872508	1.65337	11.6688	6.31e-28	1.72e-26	52.515
COL9A3	2.17212	2.53901	11.6635	6.62e-28	1.8e-26	52.4665
RAG1	0.706373	0.821253	11.6592	6.89e-28	1.87e-26	52.4273
VAV3	1.19611	3.38125	11.6591	6.9e-28	1.87e-26	52.4259
TP53INP2	0.78003	5.26908	11.6564	7.07e-28	1.91e-26	52.4015
MT1E	1.39599	7.69028	11.6556	7.12e-28	1.92e-26	52.3944
ELFN2	-1.09688	0.97299	-11.6447	7.87e-28	2.12e-26	52.2955
PLAUR	-1.34871	3.91648	-11.6413	8.12e-28	2.19e-26	52.2643
USP2	0.744337	2.10752	11.6375	8.41e-28	2.26e-26	52.2295
SYT1	-1.32973	1.67132	-11.6366	8.48e-28	2.28e-26	52.2216
NEXMIF	0.335872	0.372683	11.6306	8.96e-28	2.4e-26	52.1671
MROH7	0.380748	0.524007	11.6282	9.16e-28	2.45e-26	52.1453
ATP2C2	0.854807	1.21292	11.6257	9.37e-28	2.5e-26	52.1223
PTGES3L	0.247439	0.420063	11.6255	9.39e-28	2.51e-26	52.1203
CTHRC1	-1.68764	3.77036	-11.6136	1.05e-27	2.79e-26	52.0127
RNF225	-0.807219	1.13327	-11.6132	1.05e-27	2.79e-26	52.0091
FBLN7	0.792264	2.90355	11.6128	1.05e-27	2.8e-26	52.0058
KLF16	-0.581429	3.79111	-11.6117	1.07e-27	2.83e-26	51.9952
CHCHD10	0.894061	6.57281	11.609	1.09e-27	2.89e-26	51.9709
ARL4D	0.76415	6.56241	11.6068	1.11e-27	2.95e-26	51.9509
ZYX	-0.725746	6.94752	-11.6055	1.13e-27	2.98e-26	51.9389
CAV2	-1.01712	6.56117	-11.6022	1.16e-27	3.06e-26	51.9087
FAM20A	-1.63845	5.11859	-11.5983	1.21e-27	3.17e-26	51.8732
LRP2	1.46227	4.08533	11.5937	1.26e-27	3.3e-26	51.8319
RGS16	1.04682	6.24805	11.5895	1.31e-27	3.43e-26	51.7937
HACD1	-0.863784	3.14233	-11.5858	1.35e-27	3.54e-26	51.7602
RELB	-0.615374	4.45706	-11.5791	1.44e-27	3.75e-26	51.6996
GNAS	0.796131	9.58539	11.5749	1.49e-27	3.9e-26	51.6617
FHL3	-0.68921	4.44662	-11.5727	1.52e-27	3.97e-26	51.6412
COX7B	0.475803	6.28884	11.5711	1.55e-27	4.02e-26	51.6268
CLEC2B	-0.736873	3.51729	-11.5687	1.58e-27	4.11e-26	51.605
XK	0.719006	1.34741	11.5665	1.61e-27	4.18e-26	51.5856
ASXL3	0.529252	0.418456	11.5644	1.64e-27	4.26e-26	51.566
LRGUK	0.312998	0.422396	11.5563	1.77e-27	4.58e-26	51.4928
RBP7	0.904995	5.33436	11.5503	1.87e-27	4.83e-26	51.4386
HAP1	0.72336	0.868137	11.5481	1.91e-27	4.92e-26	51.4188
ACOT7	-0.628693	4.00748	-11.5466	1.93e-27	4.98e-26	51.4052
DLG2	0.835201	1.19748	11.5463	1.94e-27	4.98e-26	51.4026
MT1M	1.63662	3.8354	11.5455	1.95e-27	5e-26	51.3952
ATP6V0E2	0.835683	4.54429	11.5454	1.95e-27	5e-26	51.3945
CCDC33	-0.700893	0.995291	-11.5453	1.96e-27	5e-26	51.3936
CDK5RAP2	-1.01729	5.04493	-11.5453	1.96e-27	5e-26	51.3932
CD276	-0.675136	5.40681	-11.5403	2.05e-27	5.23e-26	51.3478
OCIAD2	-0.54057	6.83087	-11.5397	2.06e-27	5.25e-26	51.3426
PREX2	0.833572	2.01956	11.5382	2.09e-27	5.31e-26	51.3286
ZNF480	0.479347	3.1926	11.5325	2.2e-27	5.58e-26	51.2779
BHLHE40	-1.07347	7.91366	-11.5253	2.35e-27	5.95e-26	51.2126
ASRGL1	0.585699	1.93332	11.5253	2.35e-27	5.95e-26	51.2123
ZNF714	-1.0112	3.03511	-11.5218	2.42e-27	6.13e-26	51.1809
INSL3	-0.752882	1.14337	-11.5195	2.48e-27	6.25e-26	51.1597
NBL1	-1.26752	5.83336	-11.5177	2.52e-27	6.35e-26	51.1437
PELI1	-1.159	4.65758	-11.5152	2.58e-27	6.48e-26	51.121
MAPRE2	0.661713	4.25918	11.5111	2.68e-27	6.72e-26	51.0836
DLL3	0.601346	0.544988	11.5109	2.68e-27	6.73e-26	51.0819
CA12	1.93527	4.14457	11.4894	3.26e-27	8.17e-26	50.8881
CEBPA	0.918822	2.67042	11.4795	3.57e-27	8.93e-26	50.7986
MMP16	-1.16135	2.2368	-11.4766	3.66e-27	9.16e-26	50.772
FAM151A	0.469954	0.848508	11.4692	3.92e-27	9.78e-26	50.7057
ITGB4	-1.20816	5.35901	-11.464	4.11e-27	1.02e-25	50.6586
AHR	-0.903453	5.14487	-11.4635	4.13e-27	1.03e-25	50.654
FAHD2A	0.595066	3.74495	11.4627	4.16e-27	1.03e-25	50.6469
SDSL	0.667746	5.7045	11.4622	4.18e-27	1.04e-25	50.6421
FRMD5	-1.30581	2.10558	-11.4571	4.38e-27	1.08e-25	50.5961
PLP2	-0.909159	6.56587	-11.4557	4.43e-27	1.1e-25	50.5843
CFAP46	0.583867	1.2887	11.4541	4.5e-27	1.11e-25	50.5694
CD164L2	-1.18685	2.57369	-11.4532	4.53e-27	1.12e-25	50.5615
CLPB	0.38728	2.54204	11.4525	4.56e-27	1.12e-25	50.5553
LRP1B	0.89073	0.68104	11.4504	4.65e-27	1.14e-25	50.5359
GCNT4	-0.868785	1.83871	-11.4488	4.72e-27	1.16e-25	50.5218
SLC7A6	0.54897	1.64963	11.4462	4.83e-27	1.18e-25	50.4987
CHRM3	0.661132	1.11542	11.4403	5.1e-27	1.25e-25	50.4449
ADAMTS14	-1.10942	1.53603	-11.4298	5.61e-27	1.37e-25	50.3505
CKB	0.945544	7.41348	11.4266	5.77e-27	1.41e-25	50.3223
UQCC2	0.512994	4.26435	11.4253	5.84e-27	1.42e-25	50.3101
CLYBL	0.426404	1.75554	11.4249	5.86e-27	1.43e-25	50.3069
SEPTIN9	-0.577719	6.18588	-11.4239	5.92e-27	1.44e-25	50.2973
COLEC10	0.653783	0.838123	11.4227	5.98e-27	1.45e-25	50.2866
MYO1D	-0.782028	6.60739	-11.4191	6.18e-27	1.5e-25	50.2548
S100B	-1.71539	2.83768	-11.4146	6.44e-27	1.56e-25	50.2142
MTARC1	0.953555	3.52361	11.4142	6.46e-27	1.56e-25	50.2103
TOMM34	-0.558771	6.61905	-11.413	6.53e-27	1.58e-25	50.1993
RASGEF1A	-0.843956	1.67084	-11.411	6.65e-27	1.6e-25	50.1816
NQO1	1.17261	6.23234	11.4109	6.65e-27	1.6e-25	50.1811
IGFBP5	-1.74553	9.33151	-11.409	6.77e-27	1.63e-25	50.1636
CDADC1	0.5892	3.32533	11.4067	6.91e-27	1.66e-25	50.1431
VTCN1	-1.62933	1.63151	-11.4045	7.06e-27	1.69e-25	50.1229
TMEM178B	1.31764	3.2723	11.4033	7.13e-27	1.71e-25	50.112
NRIP1	-1.20177	4.17556	-11.4021	7.21e-27	1.72e-25	50.1013
IKZF3	-1.06372	2.98888	-11.4017	7.23e-27	1.73e-25	50.0982
ST6GAL1	1.29848	4.5223	11.4	7.35e-27	1.75e-25	50.0824
S100A4	-1.54705	8.41472	-11.3992	7.4e-27	1.76e-25	50.0757
CD36	1.3605	2.78381	11.3958	7.64e-27	1.81e-25	50.0448
STAM	-0.682537	4.75512	-11.3952	7.68e-27	1.82e-25	50.0395
NAT16	1.07285	0.861652	11.3948	7.7e-27	1.83e-25	50.036
REN	-1.0428	1.86697	-11.3929	7.84e-27	1.86e-25	50.0188
CWH43	1.49488	1.84976	11.3906	8e-27	1.89e-25	49.9981
VLDLR	0.911908	2.60832	11.3887	8.14e-27	1.92e-25	49.9816
RTN4IP1	0.450188	3.13495	11.3882	8.18e-27	1.93e-25	49.9765
GPR155	0.697777	2.27387	11.3852	8.41e-27	1.98e-25	49.9495
ECE1	-0.781281	7.975	-11.3746	9.25e-27	2.17e-25	49.855
BACH2	-0.597988	1.31995	-11.3746	9.25e-27	2.17e-25	49.8545
PRIMA1	0.761724	0.718314	11.3683	9.8e-27	2.3e-25	49.798
SYN1	-0.850485	1.37308	-11.3636	1.02e-26	2.39e-25	49.7558
COL25A1	0.794187	0.995314	11.3565	1.09e-26	2.55e-25	49.6922
SPATA12	-0.247585	0.348734	-11.3561	1.09e-26	2.55e-25	49.6889
SH3BP2	-0.61408	3.5053	-11.332	1.36e-26	3.17e-25	49.4729
RFX4	0.114264	0.0850442	11.3303	1.38e-26	3.21e-25	49.4578
ROPN1L	0.376919	0.583272	11.3285	1.4e-26	3.26e-25	49.4414
MRC1	-1.24442	3.29974	-11.326	1.44e-26	3.34e-25	49.4187
TRAPPC6A	0.718792	6.20692	11.3234	1.47e-26	3.41e-25	49.3955
MUC20	-0.809647	2.59622	-11.3172	1.56e-26	3.6e-25	49.3401
PAM	-0.774715	7.11525	-11.3156	1.58e-26	3.65e-25	49.326
PAPLN	-1.03542	4.69268	-11.3101	1.66e-26	3.83e-25	49.2763
TNFSF18	-0.960213	1.26959	-11.3068	1.71e-26	3.94e-25	49.2474
BCAT2	0.475885	4.53247	11.3066	1.71e-26	3.94e-25	49.2456
SCGB2A1	1.3157	2.65249	11.3037	1.76e-26	4.04e-25	49.2193
AR	0.949515	1.61811	11.2947	1.91e-26	4.38e-25	49.139
HSPB11	0.586786	4.78406	11.2913	1.97e-26	4.51e-25	49.1087
FAM166C	0.699568	1.27764	11.2898	1.99e-26	4.56e-25	49.0953
GTF2IRD1	-0.570421	5.1459	-11.2894	2e-26	4.57e-25	49.0918
CLDN1	-1.74146	8.0986	-11.2883	2.02e-26	4.61e-25	49.0816
SLPI	-2.31763	7.59592	-11.283	2.12e-26	4.83e-25	49.0345
RIPK2	-0.467888	4.04203	-11.2806	2.16e-26	4.93e-25	49.013
RAB19	0.585702	2.662	11.278	2.22e-26	5.04e-25	48.9901
RAB27A	-0.988204	6.43709	-11.2691	2.4e-26	5.46e-25	48.9098
DUS4L-BCAP29	0.569411	2.05475	11.2624	2.55e-26	5.78e-25	48.8507
C9orf43	0.379795	0.840347	11.2603	2.6e-26	5.89e-25	48.8319
GPNMB	-1.59451	5.23152	-11.2592	2.63e-26	5.94e-25	48.8219
ANKH	-0.832221	4.81369	-11.2571	2.67e-26	6.04e-25	48.8034
CLIP3	-1.06649	4.00949	-11.2465	2.94e-26	6.64e-25	48.7082
RAC3	0.745448	3.15172	11.2462	2.95e-26	6.65e-25	48.7063
KIF1A	0.85308	0.617045	11.232	3.35e-26	7.55e-25	48.5792
BTBD17	0.931644	0.487843	11.2273	3.5e-26	7.86e-25	48.5376
FADS3	-0.506106	3.19245	-11.2218	3.68e-26	8.25e-25	48.4883
METTL7B	-1.37743	6.88379	-11.2205	3.72e-26	8.34e-25	48.4772
DVL1	-0.532036	6.55698	-11.213	3.98e-26	8.91e-25	48.4104
PHF13	-0.518566	4.83254	-11.1925	4.79e-26	1.07e-24	48.2276
SLIT2	-1.18438	3.10498	-11.1857	5.08e-26	1.14e-24	48.1675
GABRR2	0.292072	0.551403	11.1775	5.47e-26	1.22e-24	48.0947
GNLY	-1.44221	3.23012	-11.1751	5.59e-26	1.25e-24	48.0729
CCL17	-1.85149	2.99913	-11.1723	5.73e-26	1.28e-24	48.0486
IVL	-1.70991	2.10396	-11.1717	5.76e-26	1.28e-24	48.0433
CDSN	-0.226623	0.234448	-11.1655	6.1e-26	1.35e-24	47.9879
KRT27	1.11126	1.95493	11.1592	6.45e-26	1.43e-24	47.9324
STAT1	-1.04029	6.21476	-11.1591	6.46e-26	1.43e-24	47.9308
FGF9	-0.442046	0.534966	-11.1564	6.62e-26	1.46e-24	47.9069
SLC20A1	-0.743488	4.60815	-11.155	6.7e-26	1.48e-24	47.8948
ATP5PD	0.468275	6.39052	11.155	6.7e-26	1.48e-24	47.8946
CYP17A1	0.500828	0.590213	11.1543	6.74e-26	1.48e-24	47.8883
BAG3	-0.683747	6.48952	-11.154	6.76e-26	1.49e-24	47.8857
DCDC2	-0.83618	4.33656	-11.1525	6.85e-26	1.5e-24	47.8726
PRR36	-0.970013	3.67356	-11.1462	7.25e-26	1.59e-24	47.8165
ZNF491	0.383856	1.26622	11.1446	7.35e-26	1.61e-24	47.8027
ACOT11	0.622921	1.92186	11.1431	7.45e-26	1.63e-24	47.7893
FA2H	0.876525	1.96068	11.141	7.59e-26	1.66e-24	47.7708
DGKI	1.19262	1.92926	11.1383	7.78e-26	1.7e-24	47.7465
KCNE3	1.08553	2.80742	11.1374	7.84e-26	1.71e-24	47.7389
EHF	-1.41787	3.51256	-11.1326	8.19e-26	1.78e-24	47.696
RGS17	0.734638	0.960152	11.1321	8.22e-26	1.79e-24	47.692
KCNS3	-0.81536	3.22368	-11.1283	8.51e-26	1.85e-24	47.6578
FLII	-0.500629	6.58349	-11.1266	8.64e-26	1.87e-24	47.6425
CHST14	0.664963	5.12169	11.1262	8.67e-26	1.88e-24	47.6391
SYT3	0.489896	0.44288	11.1243	8.82e-26	1.91e-24	47.6225
NECAB3	0.607477	4.44834	11.1136	9.7e-26	2.09e-24	47.528
UBE2D4	0.328319	3.40226	11.1134	9.72e-26	2.1e-24	47.5257
PITX3	-0.513894	0.639854	-11.1131	9.75e-26	2.1e-24	47.5235
SLC35G1	0.603789	1.93501	11.1081	1.02e-25	2.19e-24	47.4793
ANG	-0.683806	2.50473	-11.1079	1.02e-25	2.19e-24	47.4775
SUSD5	0.975824	2.24639	11.1048	1.05e-25	2.25e-24	47.4495
DNAAF1	0.643406	0.921244	11.0884	1.22e-25	2.6e-24	47.3047
ADAMTS5	0.931878	2.24662	11.0748	1.37e-25	2.94e-24	47.1848
COL4A5	0.859752	2.82455	11.072	1.41e-25	3.01e-24	47.16
PAIP2B	0.809579	2.68184	11.0694	1.44e-25	3.07e-24	47.1371
LTBP3	-0.820406	7.0304	-11.0633	1.52e-25	3.24e-24	47.0827
CLN5	0.465955	1.93452	11.0584	1.59e-25	3.38e-24	47.04
DUSP6	-1.17988	8.20221	-11.052	1.68e-25	3.58e-24	46.9831
PPM1H	0.652947	2.72453	11.0517	1.69e-25	3.58e-24	46.981
STRADB	-0.732735	5.01937	-11.0491	1.73e-25	3.66e-24	46.9574
MED13	-0.856586	5.33376	-11.0418	1.84e-25	3.9e-24	46.8935
RXRG	-1.95873	6.0979	-11.0413	1.85e-25	3.92e-24	46.8886
FAM111B	-0.942508	2.43741	-11.0301	2.04e-25	4.32e-24	46.7899
SNX22	-1.31173	6.60917	-11.0279	2.08e-25	4.4e-24	46.7707
RAC2	-1.31944	4.90884	-11.027	2.1e-25	4.43e-24	46.7629
ESAM	0.818095	7.19571	11.0253	2.13e-25	4.49e-24	46.7478
C2CD2	0.460689	3.14973	11.0228	2.18e-25	4.58e-24	46.7261
GOLGA8R	0.611213	0.860536	11.0226	2.19e-25	4.59e-24	46.7239
HOGA1	0.586848	0.621651	11.0167	2.3e-25	4.83e-24	46.6719
ZSCAN1	0.752633	1.84478	11.0046	2.56e-25	5.37e-24	46.5659
CDCA4	-0.485761	3.70808	-11.0008	2.65e-25	5.55e-24	46.532
NOTCH2	-0.890504	4.9974	-10.9993	2.69e-25	5.62e-24	46.5187
EPHA4	-1.18416	5.30336	-10.9942	2.81e-25	5.87e-24	46.4739
MAPT	0.566754	0.637225	10.994	2.82e-25	5.88e-24	46.472
CCL22	-1.26014	2.0035	-10.9856	3.04e-25	6.32e-24	46.3988
CYSRT1	-0.915259	3.36379	-10.9846	3.06e-25	6.37e-24	46.3895
ADIPOR2	0.624048	5.46176	10.9751	3.33e-25	6.92e-24	46.3059
TMEM116	0.501133	2.37542	10.9689	3.52e-25	7.3e-24	46.252
CHAF1B	-0.497685	2.38943	-10.9669	3.58e-25	7.43e-24	46.2343
RND1	0.836606	2.45995	10.9645	3.66e-25	7.58e-24	46.2133
FERMT1	0.902997	1.58658	10.9572	3.91e-25	8.07e-24	46.1489
LRRIQ3	0.322875	0.489448	10.9563	3.94e-25	8.13e-24	46.1407
OR2T8	0.564966	0.724088	10.9502	4.16e-25	8.57e-24	46.0874
EHD2	-0.624639	6.8375	-10.948	4.24e-25	8.73e-24	46.068
S100A16	-0.585616	7.67083	-10.9478	4.25e-25	8.74e-24	46.0662
ZFP69B	-0.573897	1.81993	-10.9474	4.26e-25	8.76e-24	46.0625
ELF4	-0.669222	3.45187	-10.9444	4.38e-25	8.98e-24	46.0365
AVPR1A	1.1134	1.8565	10.9415	4.49e-25	9.2e-24	46.0115
SLC17A5	-0.86376	7.23996	-10.9391	4.59e-25	9.39e-24	45.9901
FAM189A1	1.05973	1.51187	10.9373	4.66e-25	9.53e-24	45.9739
COL4A6	0.43271	0.448464	10.9309	4.93e-25	1.01e-23	45.9182
NHSL2	-0.732964	3.61368	-10.9285	5.04e-25	1.03e-23	45.897
BTNL9	1.13968	2.86514	10.921	5.39e-25	1.1e-23	45.8312
CEACAM6	-1.86675	2.51022	-10.9207	5.4e-25	1.1e-23	45.8289
TGFBR3L	-0.577332	0.755757	-10.9202	5.42e-25	1.1e-23	45.8248
B3GALNT2	0.535039	2.69437	10.9158	5.64e-25	1.14e-23	45.7863
ROR1	-0.809958	1.40672	-10.9145	5.7e-25	1.16e-23	45.7747
PON2	-0.647607	5.85535	-10.9082	6.03e-25	1.22e-23	45.7197
APOA1	1.34369	1.51493	10.9024	6.35e-25	1.28e-23	45.6685
GALNT7	-0.918044	5.29744	-10.9016	6.4e-25	1.29e-23	45.6611
GOLGA8Q	0.661768	0.611119	10.9004	6.46e-25	1.3e-23	45.6509
TFAP2C	-0.934618	3.19849	-10.8984	6.58e-25	1.33e-23	45.6337
BNIP1	0.410408	3.6888	10.8981	6.59e-25	1.33e-23	45.6312
TMEM220	0.747196	3.12312	10.8907	7.04e-25	1.42e-23	45.5661
DUSP19	0.569955	1.74676	10.8874	7.25e-25	1.46e-23	45.5369
RASSF10	0.587802	0.451962	10.8847	7.43e-25	1.49e-23	45.5134
TM4SF1	-1.3472	6.94948	-10.8816	7.63e-25	1.53e-23	45.4866
KIF19	0.890914	0.815516	10.8795	7.77e-25	1.56e-23	45.4683
BOLA3	0.4064	2.18936	10.8764	7.99e-25	1.6e-23	45.4413
ARAP1	-0.548849	5.71651	-10.8759	8.02e-25	1.6e-23	45.4368
CST2	-1.93404	2.32706	-10.8751	8.08e-25	1.61e-23	45.4299
TECTA	0.308933	0.748387	10.8732	8.22e-25	1.64e-23	45.4129
DPP6	1.21397	1.18375	10.8713	8.35e-25	1.66e-23	45.3967
TSNAXIP1	0.441474	0.642154	10.8636	8.95e-25	1.78e-23	45.3291
TTC23L	0.308273	0.612382	10.8593	9.29e-25	1.84e-23	45.292
CYP27B1	0.819342	2.45801	10.8561	9.56e-25	1.89e-23	45.2636
SNX8	-0.450755	4.84118	-10.8533	9.8e-25	1.94e-23	45.2392
MMP7	-1.96147	2.88237	-10.8528	9.83e-25	1.94e-23	45.2354
NGFR	-1.66222	4.04727	-10.852	9.91e-25	1.96e-23	45.2281
VIPR1	0.782857	1.30425	10.8514	9.96e-25	1.96e-23	45.2229
CTSA	-0.436346	5.13874	-10.848	1.03e-24	2.02e-23	45.1932
ZNF217	-0.738745	5.14711	-10.8472	1.03e-24	2.03e-23	45.1862
RAB11FIP4	-0.57247	3.59708	-10.8447	1.06e-24	2.08e-23	45.1645
CCL18	-2.00917	4.61979	-10.8427	1.08e-24	2.11e-23	45.1466
FIGNL1	-0.539393	2.69461	-10.8426	1.08e-24	2.11e-23	45.1456
BCL2L1	-0.619198	6.64842	-10.833	1.17e-24	2.3e-23	45.062
IL4R	-0.651745	4.91917	-10.8323	1.18e-24	2.31e-23	45.0562
SDC3	-0.782625	5.85404	-10.8295	1.21e-24	2.36e-23	45.0313
NUDT16	0.583877	4.76058	10.8255	1.25e-24	2.44e-23	44.997
FYN	-0.658876	6.14347	-10.8252	1.25e-24	2.45e-23	44.9942
ANKRD18A	0.470999	1.02462	10.8229	1.28e-24	2.5e-23	44.9739
DUSP13	-0.770365	0.961623	-10.8212	1.3e-24	2.53e-23	44.9594
ACP5	-1.2107	4.77184	-10.8207	1.31e-24	2.54e-23	44.9547
ZNF467	0.667083	4.02269	10.8165	1.35e-24	2.63e-23	44.9182
OGDHL	1.3747	3.46536	10.8124	1.4e-24	2.72e-23	44.8827
SLC14A2	1.20164	0.96619	10.808	1.46e-24	2.83e-23	44.8447
CHRNA7	0.244614	0.247331	10.8036	1.52e-24	2.94e-23	44.806
TMEM237	-0.487963	3.13398	-10.8014	1.55e-24	2.99e-23	44.7867
LUM	-2.09697	5.47015	-10.7979	1.6e-24	3.08e-23	44.7568
CARTPT	2.17789	1.60128	10.7973	1.6e-24	3.09e-23	44.7517
RAD18	-0.450393	2.98283	-10.7875	1.75e-24	3.37e-23	44.6663
GATA3	-0.976554	3.46195	-10.7839	1.8e-24	3.47e-23	44.6351
CCDC146	0.815373	2.92957	10.7802	1.86e-24	3.58e-23	44.6026
PBX4	0.859631	2.74185	10.7797	1.87e-24	3.59e-23	44.5984
COL1A1	-1.84487	7.03246	-10.777	1.92e-24	3.67e-23	44.5752
RIDA	0.481833	4.55432	10.7766	1.92e-24	3.68e-23	44.5712
APOL2	-0.618612	5.20249	-10.7745	1.96e-24	3.75e-23	44.5528
GOLGA8O	0.346723	0.356799	10.771	2.02e-24	3.86e-23	44.5229
S100A5	-1.05038	4.95281	-10.7686	2.06e-24	3.94e-23	44.5017
FAM234B	0.780824	2.73039	10.7601	2.22e-24	4.24e-23	44.428
NOSTRIN	0.777471	2.71883	10.7598	2.23e-24	4.25e-23	44.4252
EFHC2	0.784875	1.55786	10.7536	2.36e-24	4.48e-23	44.3712
SLC6A17	0.544311	0.411037	10.7516	2.4e-24	4.55e-23	44.3542
STOML1	0.445259	3.24546	10.7501	2.43e-24	4.61e-23	44.3409
PHKB	0.574249	4.52724	10.7488	2.46e-24	4.66e-23	44.3295
LYST	-0.665327	3.37041	-10.7465	2.5e-24	4.74e-23	44.3104
AEN	0.529901	4.3577	10.7462	2.51e-24	4.75e-23	44.3076
MCCC2	0.591043	5.69298	10.7447	2.55e-24	4.81e-23	44.2941
ZFYVE19	-0.513151	4.6815	-10.7433	2.58e-24	4.86e-23	44.2824
FIBCD1	-1.20761	1.7275	-10.7374	2.71e-24	5.11e-23	44.2313
SOWAHA	-0.929212	2.57054	-10.7331	2.82e-24	5.31e-23	44.1939
TGM2	-1.09741	5.54986	-10.7252	3.02e-24	5.68e-23	44.1249
KSR1	0.654584	2.73439	10.7244	3.04e-24	5.72e-23	44.118
LMOD1	1.09651	3.78958	10.719	3.19e-24	5.99e-23	44.0713
HPCAL4	-1.55801	3.01777	-10.7158	3.28e-24	6.15e-23	44.0438
CCNA1	-1.00324	1.76749	-10.7155	3.29e-24	6.16e-23	44.0409
CLEC5A	-0.764065	1.88121	-10.7016	3.71e-24	6.94e-23	43.9213
NCAM1	1.34017	2.69902	10.694	3.97e-24	7.41e-23	43.855
CCDC148	-0.723436	2.22369	-10.6937	3.98e-24	7.43e-23	43.8525
ERO1B	0.823742	3.86053	10.688	4.18e-24	7.79e-23	43.8034
CHPT1	-0.809652	5.77129	-10.6853	4.28e-24	7.97e-23	43.7804
GGTLC1	0.84599	1.7634	10.6801	4.48e-24	8.34e-23	43.7346
BEND6	-0.717385	1.09172	-10.6763	4.63e-24	8.61e-23	43.702
CRLF1	-2.34296	4.99109	-10.6746	4.7e-24	8.73e-23	43.6873
IFIT2	-0.818676	3.88413	-10.6743	4.71e-24	8.74e-23	43.6846
SLC17A9	-0.840046	2.17572	-10.6704	4.88e-24	9.03e-23	43.6511
GOLT1A	-1.20648	4.93047	-10.6624	5.23e-24	9.67e-23	43.5825
AJM1	0.546012	1.91216	10.6602	5.33e-24	9.85e-23	43.5634
CLCNKB	1.1312	2.62618	10.6579	5.44e-24	1e-22	43.543
TNC	-1.62855	4.63812	-10.6551	5.57e-24	1.03e-22	43.5191
ACTBL2	-0.756028	1.00061	-10.651	5.77e-24	1.06e-22	43.484
TMEM131L	-0.589583	3.45596	-10.6483	5.91e-24	1.09e-22	43.4607
NOX4	-0.736832	2.12251	-10.6417	6.26e-24	1.15e-22	43.4035
C2orf88	0.606949	1.6845	10.639	6.41e-24	1.18e-22	43.3804
KCTD8	0.991029	1.68731	10.6376	6.49e-24	1.19e-22	43.3686
LAMC2	-0.816477	6.65199	-10.6361	6.58e-24	1.2e-22	43.3553
TRPM3	0.354241	0.224159	10.6272	7.1e-24	1.3e-22	43.2789
SYBU	0.844201	2.61733	10.626	7.18e-24	1.31e-22	43.2681
MAD2L2	-0.512033	4.76934	-10.6224	7.41e-24	1.35e-22	43.237
ARHGEF38	-1.08397	1.90705	-10.605	8.62e-24	1.57e-22	43.0877
ANKRD34A	0.357187	0.82124	10.6006	8.95e-24	1.63e-22	43.05
YIPF1	0.606033	6.01966	10.5995	9.05e-24	1.65e-22	43.0398
PRTFDC1	0.730335	2.55351	10.5993	9.06e-24	1.65e-22	43.0386
TTC30A	0.632665	2.65123	10.5967	9.27e-24	1.68e-22	43.016
SLC2A3	-1.01569	4.75958	-10.5939	9.5e-24	1.72e-22	42.9918
ELAC1	0.473237	3.03665	10.5893	9.88e-24	1.79e-22	42.9523
APOO	0.445028	4.19349	10.5881	9.99e-24	1.81e-22	42.942
CRYGN	-1.23955	5.05835	-10.5838	1.04e-23	1.88e-22	42.9048
MAPKAPK3	-0.494666	7.19512	-10.5798	1.07e-23	1.94e-22	42.8708
RMI2	-0.648668	3.32031	-10.5795	1.08e-23	1.94e-22	42.8678
KLK12	-1.14477	1.1792	-10.578	1.09e-23	1.96e-22	42.8556
EML1	0.72115	2.87244	10.573	1.14e-23	2.05e-22	42.8124
GDF15	-1.48439	6.61838	-10.5722	1.15e-23	2.06e-22	42.8055
RAB34	-0.625504	7.23607	-10.5697	1.17e-23	2.11e-22	42.7839
EEF1AKMT4	0.605292	3.03065	10.5683	1.19e-23	2.13e-22	42.7723
KIAA1614	0.500013	1.77093	10.5586	1.29e-23	2.31e-22	42.6887
KCNA2	0.505698	0.383395	10.5577	1.3e-23	2.33e-22	42.6811
ADAL	0.513966	2.86036	10.5563	1.32e-23	2.35e-22	42.6694
USP44	0.393706	0.885535	10.5559	1.32e-23	2.36e-22	42.6657
TDRKH	-0.593823	4.07514	-10.5515	1.37e-23	2.45e-22	42.6282
GLS	-0.65934	5.38645	-10.5493	1.4e-23	2.49e-22	42.6092
C1orf226	-0.763605	2.78334	-10.545	1.45e-23	2.59e-22	42.5723
TLE6	0.758559	2.87517	10.5442	1.46e-23	2.6e-22	42.5649
CNTFR	1.6338	1.5019	10.5396	1.52e-23	2.71e-22	42.5257
FBXO15	0.362022	0.641769	10.537	1.56e-23	2.76e-22	42.5032
SFRP2	-2.51796	4.71126	-10.5348	1.58e-23	2.81e-22	42.485
UGT8	0.992804	2.25015	10.5329	1.61e-23	2.86e-22	42.4683
TMEM88	1.01952	4.64314	10.5249	1.73e-23	3.06e-22	42.3994
IQGAP3	-0.577777	1.34175	-10.5245	1.73e-23	3.07e-22	42.3968
MAPK10	0.472987	1.47109	10.5209	1.79e-23	3.16e-22	42.3653
FSD2	0.305531	0.283658	10.5186	1.82e-23	3.22e-22	42.3456
CKMT2	1.04742	2.75126	10.5178	1.84e-23	3.24e-22	42.3394
TMC8	-1.02093	3.74749	-10.5113	1.94e-23	3.42e-22	42.2831
CDH16	1.75532	2.35614	10.5102	1.96e-23	3.45e-22	42.274
CYCS	0.545738	5.42463	10.5037	2.08e-23	3.65e-22	42.2184
CUX2	1.16704	0.765806	10.502	2.11e-23	3.7e-22	42.2035
TMEM41A	-0.427161	3.87871	-10.5013	2.12e-23	3.72e-22	42.1982
SCN1B	-0.767794	3.24528	-10.5	2.14e-23	3.76e-22	42.1867
CALR	0.750575	10.3611	10.4975	2.19e-23	3.83e-22	42.1651
SPR	0.541348	5.69975	10.4938	2.26e-23	3.95e-22	42.1342
SHF	-0.768117	3.55969	-10.4916	2.3e-23	4.03e-22	42.115
DAND5	0.381912	0.427459	10.4887	2.36e-23	4.13e-22	42.0898
TGIF1	-0.664168	5.08132	-10.4754	2.65e-23	4.62e-22	41.9765
CRYBG2	-0.563932	0.818356	-10.4681	2.82e-23	4.92e-22	41.9138
CLDN9	-1.37431	4.21503	-10.4649	2.9e-23	5.05e-22	41.8872
PTGS2	-1.17738	2.64074	-10.4624	2.96e-23	5.15e-22	41.8656
FKBP1A	0.448637	6.86481	10.4584	3.07e-23	5.33e-22	41.8312
NFE2L3	-1.39134	3.71279	-10.4583	3.07e-23	5.33e-22	41.8307
ANXA6	0.595806	6.44058	10.4566	3.12e-23	5.4e-22	41.8164
THOC5	-0.481142	3.53103	-10.453	3.21e-23	5.57e-22	41.7855
ADGRA3	0.705002	3.68964	10.4514	3.26e-23	5.64e-22	41.772
SLC43A1	0.84724	3.04106	10.4469	3.39e-23	5.86e-22	41.7332
DUOXA2	1.39169	4.87938	10.4466	3.4e-23	5.86e-22	41.7309
LONRF2	-1.18058	5.16174	-10.4454	3.43e-23	5.92e-22	41.7205
KCNK15	-1.0172	3.38592	-10.4425	3.52e-23	6.06e-22	41.6958
WWOX	0.586271	3.73083	10.4392	3.62e-23	6.23e-22	41.668
KRT10	0.612035	4.88708	10.4378	3.66e-23	6.3e-22	41.6561
CD207	-1.59539	2.44652	-10.4358	3.73e-23	6.4e-22	41.6389
LRRFIP2	0.395412	3.73551	10.4356	3.74e-23	6.41e-22	41.6369
OSCAR	-0.946937	2.62258	-10.4345	3.77e-23	6.46e-22	41.6277
ZNF781	0.523251	1.27059	10.4341	3.78e-23	6.48e-22	41.6242
NEB	0.856671	0.693042	10.4335	3.8e-23	6.5e-22	41.6192
POLI	0.607352	3.35219	10.43	3.92e-23	6.7e-22	41.5896
CNTNAP3	0.224865	0.23354	10.4294	3.94e-23	6.73e-22	41.5842
SH2D5	-0.580336	1.27688	-10.4272	4.02e-23	6.85e-22	41.5656
ITGB6	-0.996157	3.9555	-10.4227	4.17e-23	7.11e-22	41.5274
CA4	1.74255	2.84713	10.4223	4.19e-23	7.13e-22	41.5238
FASTKD1	0.417025	3.26315	10.4207	4.25e-23	7.22e-22	41.5104
FGF2	-0.683898	2.37055	-10.4168	4.39e-23	7.46e-22	41.4767
LSR	-0.556112	7.55232	-10.4151	4.45e-23	7.56e-22	41.463
OR2W3	1.05173	2.79154	10.4138	4.51e-23	7.64e-22	41.4514
MPC1	0.533272	6.10922	10.4057	4.83e-23	8.18e-22	41.3829
MMD	0.778115	3.91364	10.4051	4.85e-23	8.21e-22	41.378
ATP5MC1	0.458129	6.2977	10.4022	4.98e-23	8.41e-22	41.3529
PRRG1	-0.76941	3.89407	-10.4	5.07e-23	8.56e-22	41.3346
IGF2BP2	-1.18259	4.98516	-10.3992	5.11e-23	8.62e-22	41.3273
CD52	-1.2752	5.02382	-10.3988	5.13e-23	8.64e-22	41.3241
SYT9	0.458435	0.553766	10.3927	5.4e-23	9.1e-22	41.2719
VPS16	0.387598	4.88354	10.3856	5.74e-23	9.65e-22	41.2122
LEKR1	0.374255	0.93082	10.3836	5.84e-23	9.81e-22	41.1948
GPD1L	0.681868	5.64746	10.3795	6.05e-23	1.02e-21	41.1601
TRIM14	-0.793647	4.0144	-10.3754	6.27e-23	1.05e-21	41.1252
FGF20	-0.771846	1.16859	-10.3745	6.31e-23	1.06e-21	41.1181
SLC25A37	-0.604281	4.59402	-10.3729	6.4e-23	1.07e-21	41.1045
PKNOX2	1.48346	2.09052	10.3716	6.47e-23	1.08e-21	41.0935
MRPL34	0.475575	6.38751	10.3708	6.52e-23	1.09e-21	41.0866
NRCAM	-0.899142	4.6275	-10.3682	6.67e-23	1.11e-21	41.064
MANF	0.78763	6.9166	10.3604	7.13e-23	1.19e-21	40.9982
HSPB7	1.42177	2.9205	10.3577	7.29e-23	1.21e-21	40.9753
PHACTR3	-0.642955	0.828731	-10.3538	7.54e-23	1.25e-21	40.942
MAP3K1	-0.721893	5.80621	-10.3514	7.7e-23	1.28e-21	40.9222
SLC18B1	0.525408	4.21234	10.3498	7.81e-23	1.3e-21	40.908
ACAD10	0.488527	3.66439	10.3476	7.96e-23	1.32e-21	40.8894
MFAP2	-1.24022	3.49853	-10.3386	8.59e-23	1.42e-21	40.8136
APOL1	-0.918765	6.06	-10.3351	8.85e-23	1.47e-21	40.7839
PYY	0.572933	1.03969	10.3294	9.29e-23	1.54e-21	40.7357
GNMT	0.658662	1.56576	10.3267	9.51e-23	1.57e-21	40.7131
TUSC3	-1.17267	5.24402	-10.3201	1.01e-22	1.66e-21	40.6567
POPDC2	0.551742	2.53407	10.3179	1.03e-22	1.69e-21	40.6384
MCM5	-0.490994	4.36709	-10.3117	1.08e-22	1.78e-21	40.5859
ISM1	1.19527	4.88608	10.3107	1.09e-22	1.8e-21	40.5771
TTLL7	0.525093	1.03195	10.3098	1.1e-22	1.81e-21	40.5697
PRR15	-2.09434	6.59273	-10.3	1.19e-22	1.96e-21	40.4874
HSD11B2	1.15265	2.93058	10.3	1.19e-22	1.96e-21	40.4871
MEX3D	-0.634262	4.61198	-10.2989	1.21e-22	1.98e-21	40.4774
GNRH2	0.434968	0.661028	10.2967	1.23e-22	2.01e-21	40.4589
GATA5	1.28155	1.06514	10.2953	1.24e-22	2.04e-21	40.4473
TOR2A	0.434899	3.33525	10.2937	1.26e-22	2.06e-21	40.4341
HYKK	0.356277	1.4184	10.2935	1.26e-22	2.06e-21	40.4321
SDK2	0.66576	1.0591	10.2932	1.27e-22	2.07e-21	40.4293
SOCS2	0.679429	2.93302	10.2918	1.28e-22	2.09e-21	40.4176
FOXA2	1.27286	1.75833	10.2915	1.28e-22	2.09e-21	40.4153
H3C8	0.369465	0.661863	10.2845	1.36e-22	2.22e-21	40.3565
PPP1R42	0.397664	0.674269	10.282	1.39e-22	2.26e-21	40.3352
PIWIL2	0.434932	0.565504	10.2803	1.41e-22	2.3e-21	40.3209
RTN2	-0.600735	2.30485	-10.2772	1.45e-22	2.36e-21	40.2942
PIP5KL1	-0.812553	2.40982	-10.2762	1.46e-22	2.37e-21	40.2861
SCML2	0.467953	1.1748	10.2719	1.52e-22	2.46e-21	40.2501
SLC1A2	0.235066	0.195309	10.2685	1.56e-22	2.53e-21	40.2215
C2orf73	0.385884	0.693845	10.2659	1.6e-22	2.58e-21	40.1996
PPIF	0.614358	5.72938	10.2644	1.62e-22	2.61e-21	40.1865
MPV17L2	0.38813	4.49598	10.2599	1.68e-22	2.71e-21	40.1485
RIC8B	0.56621	3.26525	10.2595	1.69e-22	2.72e-21	40.1454
SLC39A14	0.828727	5.79076	10.259	1.7e-22	2.73e-21	40.1412
ZP1	0.263778	0.236135	10.2531	1.78e-22	2.87e-21	40.0912
ZFYVE28	0.50275	2.71735	10.2506	1.82e-22	2.93e-21	40.0704
CENPX	0.533748	5.28285	10.25	1.83e-22	2.94e-21	40.065
ST8SIA4	-0.723818	3.32469	-10.2497	1.84e-22	2.94e-21	40.0628
CTSS	-0.857798	6.59757	-10.248	1.86e-22	2.98e-21	40.0485
C5orf63	0.415596	1.42655	10.2434	1.94e-22	3.1e-21	40.0101
SIGLEC15	-1.1614	2.04842	-10.2394	2e-22	3.2e-21	39.9758
MARVELD1	-0.686961	4.72077	-10.234	2.1e-22	3.35e-21	39.9303
CCL7	-0.549029	0.597641	-10.2306	2.16e-22	3.44e-21	39.9024
ARSI	-0.784927	0.904036	-10.2306	2.16e-22	3.44e-21	39.902
CARD11	-1.10785	2.54117	-10.2294	2.18e-22	3.48e-21	39.8919
ADCY1	0.785702	2.01296	10.2251	2.26e-22	3.6e-21	39.8555
MISP	-1.38552	2.73314	-10.2241	2.28e-22	3.63e-21	39.847
HPGDS	-0.646556	1.65335	-10.2238	2.29e-22	3.63e-21	39.8453
SYPL2	0.824317	3.03952	10.2224	2.32e-22	3.68e-21	39.8329
CAV1	-1.13243	7.64598	-10.2219	2.33e-22	3.69e-21	39.8287
PARD3	-0.565568	4.72212	-10.2198	2.37e-22	3.75e-21	39.8112
IHO1	0.244539	0.465516	10.2193	2.38e-22	3.76e-21	39.8071
PLS3	-0.684066	8.61951	-10.2175	2.41e-22	3.82e-21	39.7922
RSPH6A	0.974278	2.29349	10.2168	2.43e-22	3.83e-21	39.7863
NDUFB1	0.479751	5.92117	10.215	2.46e-22	3.89e-21	39.7711
BCL2	0.882081	3.97773	10.2141	2.49e-22	3.92e-21	39.763
KRT15	-0.9599	1.76615	-10.2139	2.49e-22	3.92e-21	39.7615
EGF	0.560626	0.799156	10.2111	2.55e-22	4.01e-21	39.7383
EPOP	-0.776857	2.39496	-10.2108	2.55e-22	4.02e-21	39.7357
TRIM29	-1.2952	2.15059	-10.21	2.57e-22	4.04e-21	39.729
ATP4A	0.463736	0.481327	10.2091	2.59e-22	4.07e-21	39.7212
C9orf153	0.106257	0.149244	10.2062	2.66e-22	4.17e-21	39.6969
DNAI3	0.449071	1.0891	10.2059	2.66e-22	4.17e-21	39.6949
FAM13C	0.485751	1.09405	10.2058	2.67e-22	4.17e-21	39.6933
CFAP221	0.41973	0.861573	10.205	2.68e-22	4.2e-21	39.687
CHST2	-1.04873	6.18084	-10.1964	2.89e-22	4.51e-21	39.6145
NOL3	0.461158	4.91933	10.1904	3.04e-22	4.74e-21	39.5647
ATP1B3	-0.561048	6.66703	-10.1874	3.12e-22	4.86e-21	39.5392
SGIP1	0.944233	1.45134	10.1854	3.17e-22	4.94e-21	39.5224
DIO2	1.24103	6.17365	10.183	3.23e-22	5.04e-21	39.5025
KIT	1.44028	3.29211	10.1796	3.33e-22	5.18e-21	39.4741
TCF7	-0.848193	3.33733	-10.1788	3.35e-22	5.21e-21	39.4673
ADCY7	-0.715642	1.46596	-10.1691	3.64e-22	5.65e-21	39.3855
PAPSS1	-0.566549	6.21332	-10.169	3.64e-22	5.65e-21	39.3853
SYNDIG1	1.05205	2.26985	10.1635	3.82e-22	5.92e-21	39.3386
NDUFA1	0.414532	9.06046	10.1628	3.84e-22	5.95e-21	39.3327
LGMN	0.690629	6.69823	10.1608	3.91e-22	6.04e-21	39.3159
BIRC3	-1.17366	2.88231	-10.1603	3.92e-22	6.06e-21	39.3125
AJAP1	-0.701497	1.13604	-10.1585	3.98e-22	6.14e-21	39.2974
BRINP2	-0.819764	1.0976	-10.1545	4.12e-22	6.35e-21	39.2639
SLC22A4	-0.470524	1.64772	-10.1528	4.18e-22	6.44e-21	39.2496
NT5C3B	0.52445	5.80897	10.1524	4.19e-22	6.46e-21	39.2458
ARHGAP44	-0.630514	3.40905	-10.1463	4.42e-22	6.79e-21	39.1949
BIRC7	-1.62164	2.53979	-10.1448	4.47e-22	6.87e-21	39.1823
NUDT11	-1.24269	2.41401	-10.1426	4.55e-22	6.99e-21	39.1643
SULT1A1	0.771374	3.25184	10.1425	4.56e-22	7e-21	39.163
SFXN4	0.496804	5.28063	10.1393	4.68e-22	7.18e-21	39.1366
CFAP54	0.257638	0.409324	10.1381	4.73e-22	7.25e-21	39.1264
CHEK2	-0.409706	2.71374	-10.1373	4.76e-22	7.29e-21	39.1196
TSACC	0.302	0.761799	10.1362	4.81e-22	7.35e-21	39.1109
DNALI1	0.970544	4.06316	10.1337	4.91e-22	7.5e-21	39.0894
RAG2	1.11716	0.60609	10.133	4.94e-22	7.54e-21	39.0834
MCEMP1	-1.00385	1.21305	-10.1324	4.96e-22	7.56e-21	39.0791
CTIF	0.451391	3.89093	10.1324	4.97e-22	7.56e-21	39.0788
RPS6KA1	0.384922	5.5295	10.126	5.24e-22	7.98e-21	39.0253
EPS8	-0.860854	5.60878	-10.1196	5.53e-22	8.41e-21	38.9722
SPATA4	0.434131	0.841942	10.1161	5.7e-22	8.66e-21	38.9427
XKRX	-1.22894	2.91232	-10.1083	6.09e-22	9.24e-21	38.8774
ETFBKMT	0.372735	1.68983	10.1072	6.14e-22	9.31e-21	38.8686
LYRM7	0.539228	3.53011	10.1026	6.39e-22	9.67e-21	38.8298
PCLO	0.495521	1.47017	10.1025	6.39e-22	9.67e-21	38.8293
EDEM1	-0.648843	5.45198	-10.1019	6.42e-22	9.71e-21	38.8243
FHIT	0.399757	2.53384	10.1011	6.47e-22	9.78e-21	38.817
GPR160	0.638246	2.52033	10.0964	6.73e-22	1.02e-20	38.7784
HPN	-1.26095	6.07695	-10.0939	6.88e-22	1.04e-20	38.7569
CCDC183	0.370301	1.27468	10.0882	7.21e-22	1.09e-20	38.7095
IGDCC4	0.961987	3.19791	10.0862	7.33e-22	1.1e-20	38.6933
CHI3L2	-1.00878	4.49437	-10.0861	7.34e-22	1.1e-20	38.6926
CD274	-0.789734	2.97021	-10.0848	7.42e-22	1.12e-20	38.6812
RRP9	-0.397098	5.67986	-10.0774	7.9e-22	1.19e-20	38.6203
GSTK1	0.35899	6.60587	10.0769	7.93e-22	1.19e-20	38.6158
C17orf107	-0.516542	1.24683	-10.0698	8.42e-22	1.26e-20	38.557
STK38	-0.502849	4.90318	-10.0694	8.45e-22	1.26e-20	38.5537
EXOC3L2	0.965948	4.5303	10.0668	8.63e-22	1.29e-20	38.5319
GRIK4	0.91048	1.14049	10.0656	8.72e-22	1.3e-20	38.5218
NACAD	-0.592329	1.42301	-10.0652	8.76e-22	1.31e-20	38.5181
OR4D6	-0.410176	0.39516	-10.0649	8.77e-22	1.31e-20	38.5161
DYNLRB2	0.556113	1.50523	10.0639	8.85e-22	1.32e-20	38.5075
CSGALNACT2	-0.648245	4.51319	-10.0633	8.9e-22	1.33e-20	38.5023
COX8A	0.537114	8.30068	10.0622	8.98e-22	1.34e-20	38.4935
CHRDL2	-0.304271	0.398475	-10.0621	8.99e-22	1.34e-20	38.4925
SETMAR	0.479025	4.11748	10.0615	9.03e-22	1.34e-20	38.4874
PRSS23	-1.21394	6.0387	-10.0613	9.05e-22	1.34e-20	38.4858
HES1	0.710515	7.37215	10.0557	9.48e-22	1.41e-20	38.4395
CITED1	-1.21121	2.70003	-10.0502	9.93e-22	1.47e-20	38.3936
C15orf61	0.392035	1.87321	10.0456	1.03e-21	1.53e-20	38.3549
MATN2	1.1393	5.64354	10.0445	1.04e-21	1.54e-20	38.3459
S100A2	-1.34979	5.01077	-10.0434	1.05e-21	1.55e-20	38.337
CDC25A	0.469022	1.75752	10.043	1.06e-21	1.56e-20	38.3336
RGS8	1.13367	0.931095	10.0421	1.06e-21	1.57e-20	38.3263
SNCG	-1.075	5.0645	-10.0408	1.07e-21	1.58e-20	38.3154
MRC2	-1.3877	6.19673	-10.0397	1.08e-21	1.6e-20	38.3065
AIFM1	0.367592	3.24739	10.0375	1.11e-21	1.63e-20	38.2877
CTNNAL1	-0.734478	7.3104	-10.0337	1.14e-21	1.68e-20	38.2565
PLVAP	0.92876	8.88872	10.0325	1.15e-21	1.69e-20	38.2467
ST14	-0.530697	7.65763	-10.0321	1.16e-21	1.7e-20	38.2434
PRSS2	-2.08308	3.23296	-10.0312	1.17e-21	1.71e-20	38.2357
RGN	0.73174	4.67387	10.0306	1.17e-21	1.72e-20	38.2306
HHATL	1.48558	4.37785	10.025	1.23e-21	1.8e-20	38.1841
ANKLE2	-0.447564	4.19524	-10.023	1.25e-21	1.83e-20	38.1676
C8orf48	0.550027	2.56481	10.018	1.3e-21	1.9e-20	38.1261
ADAT2	0.430775	1.67415	10.0164	1.32e-21	1.93e-20	38.1131
SERTM1	1.26476	1.253	10.0156	1.33e-21	1.94e-20	38.1063
UBE2O	0.498727	4.55662	10.0142	1.34e-21	1.96e-20	38.0942
FAM3D	0.518669	0.943554	10.0082	1.41e-21	2.06e-20	38.0448
FLT4	0.860442	3.55029	10.0023	1.48e-21	2.16e-20	37.9962
GLDC	1.06258	0.87589	10.0012	1.5e-21	2.18e-20	37.9868
CNTN5	0.562857	0.547739	9.99984	1.52e-21	2.2e-20	37.9756
PRKCE	0.504603	1.82828	9.9998	1.52e-21	2.2e-20	37.9753
PDE7B	0.997348	2.69141	9.99896	1.53e-21	2.21e-20	37.9683
PAQR6	-0.754369	2.54297	-9.98984	1.65e-21	2.39e-20	37.8928
C15orf62	-0.546098	1.9847	-9.98452	1.72e-21	2.5e-20	37.8487
PNPO	0.375681	3.94588	9.98034	1.78e-21	2.58e-20	37.8142
EHBP1	-0.622424	3.85205	-9.97142	1.92e-21	2.78e-20	37.7403
RAB32	-0.598432	5.17035	-9.9702	1.94e-21	2.81e-20	37.7303
DOK6	0.47402	0.791014	9.96682	2e-21	2.88e-20	37.7023
TAF1D	-0.428838	4.01083	-9.96572	2.02e-21	2.91e-20	37.6932
CD1A	-1.57935	2.2803	-9.96497	2.03e-21	2.92e-20	37.687
MFSD4A	-0.666705	2.00557	-9.96313	2.06e-21	2.97e-20	37.6718
FCER1A	-1.35331	3.06802	-9.96293	2.06e-21	2.97e-20	37.6701
CNN3	-0.557637	7.88445	-9.95772	2.16e-21	3.1e-20	37.6271
CENPJ	0.757205	2.60959	9.95684	2.17e-21	3.12e-20	37.6198
KLF15	0.823064	2.62078	9.95581	2.19e-21	3.14e-20	37.6113
POP5	0.429551	5.13097	9.95324	2.24e-21	3.21e-20	37.5901
PSTPIP2	-0.607689	2.12613	-9.95274	2.25e-21	3.22e-20	37.586
COL10A1	-1.5043	2.07832	-9.95066	2.29e-21	3.27e-20	37.5687
POLR3K	0.466137	4.71966	9.95018	2.3e-21	3.28e-20	37.5648
PFKFB1	0.323119	0.47969	9.94677	2.36e-21	3.38e-20	37.5366
FAXDC2	0.790765	4.16278	9.94418	2.42e-21	3.45e-20	37.5152
ITGA1	0.694597	3.22021	9.94096	2.48e-21	3.54e-20	37.4886
ZNF114	-0.632137	3.4361	-9.93415	2.63e-21	3.74e-20	37.4325
SLC16A10	0.622212	1.5544	9.93136	2.69e-21	3.83e-20	37.4094
SAMD4A	-0.809036	3.84196	-9.93105	2.7e-21	3.83e-20	37.4069
LMF1	0.433098	3.51476	9.93101	2.7e-21	3.83e-20	37.4065
MAFB	0.775305	5.45223	9.92878	2.75e-21	3.9e-20	37.3882
GDPD1	0.499596	2.29097	9.92628	2.8e-21	3.98e-20	37.3675
BTG3	-0.475563	5.98969	-9.92023	2.95e-21	4.18e-20	37.3177
FER1L6	0.633339	0.399222	9.92019	2.95e-21	4.18e-20	37.3174
QRFPR	0.765983	1.07657	9.91989	2.96e-21	4.19e-20	37.3149
GSTM4	0.500873	4.23094	9.91574	3.06e-21	4.33e-20	37.2807
OPLAH	0.611193	2.51307	9.91496	3.08e-21	4.35e-20	37.2743
ARMCX6	-0.740474	5.12775	-9.9143	3.1e-21	4.37e-20	37.2688
CLMN	0.598128	1.57418	9.91272	3.14e-21	4.43e-20	37.2558
DSC3	-1.16628	1.39019	-9.90902	3.24e-21	4.56e-20	37.2253
PACSIN3	-0.58849	5.5131	-9.90366	3.39e-21	4.77e-20	37.1812
PSG1	-0.918161	0.929694	-9.90292	3.41e-21	4.79e-20	37.1751
NRXN2	0.725103	1.45992	9.90076	3.47e-21	4.88e-20	37.1573
IGDCC3	0.819539	1.23508	9.89631	3.6e-21	5.06e-20	37.1207
SLC26A9	0.591104	1.06591	9.89444	3.66e-21	5.13e-20	37.1053
ZSCAN5A	0.283658	1.31209	9.89419	3.66e-21	5.14e-20	37.1033
SERPING1	-0.911758	6.16175	-9.89158	3.75e-21	5.25e-20	37.0818
PRNP	-0.66138	7.93772	-9.89011	3.79e-21	5.31e-20	37.0697
AANAT	0.172288	0.272155	9.88582	3.93e-21	5.5e-20	37.0344
MON1A	0.384919	3.06389	9.88448	3.97e-21	5.55e-20	37.0234
CFAP92	0.197617	0.462392	9.88327	4.01e-21	5.6e-20	37.0134
ITPKC	-0.512606	5.42817	-9.87858	4.17e-21	5.82e-20	36.9748
MAPRE3	0.510322	4.26245	9.8783	4.18e-21	5.83e-20	36.9726
RARB	0.719256	3.02459	9.87793	4.2e-21	5.84e-20	36.9696
VEGFD	0.219623	0.28754	9.87025	4.47e-21	6.22e-20	36.9065
CLDN7	-0.56593	7.56655	-9.86743	4.58e-21	6.37e-20	36.8833
RHOBTB1	0.714822	2.81249	9.86587	4.64e-21	6.45e-20	36.8705
IL1RL2	-0.68707	3.34457	-9.85919	4.9e-21	6.81e-20	36.8156
PKP2	-0.881876	1.63283	-9.8573	4.98e-21	6.91e-20	36.8001
EPHX1	0.627658	7.23888	9.85256	5.18e-21	7.18e-20	36.7612
UST	0.840021	5.39167	9.85033	5.28e-21	7.31e-20	36.7429
NPIPB6	0.292473	0.454617	9.84628	5.46e-21	7.55e-20	36.7097
AKAP3	0.553137	1.29321	9.84417	5.55e-21	7.68e-20	36.6924
TUBB3	-0.188191	0.242613	-9.84264	5.63e-21	7.77e-20	36.6799
ATAD3C	0.583015	4.13277	9.83878	5.81e-21	8.02e-20	36.6482
LTBP2	-0.804934	6.91146	-9.83695	5.9e-21	8.13e-20	36.6332
BAD	0.499671	4.53222	9.83525	5.98e-21	8.24e-20	36.6193
CSF1	-0.68537	4.51901	-9.83472	6.01e-21	8.27e-20	36.6149
HES2	-0.61098	0.922711	-9.83369	6.06e-21	8.34e-20	36.6065
C15orf48	-1.09976	2.72843	-9.83096	6.2e-21	8.52e-20	36.5841
SOX3	0.993231	0.594627	9.83029	6.23e-21	8.56e-20	36.5786
TRAPPC3L	0.589009	0.503214	9.82877	6.31e-21	8.66e-20	36.5662
TMEM120B	0.375829	2.26813	9.82794	6.35e-21	8.72e-20	36.5593
GLI4	0.487447	2.65095	9.82016	6.78e-21	9.29e-20	36.4957
TNFRSF18	-1.03029	2.45613	-9.81932	6.83e-21	9.35e-20	36.4888
C19orf54	0.385921	3.56569	9.81787	6.91e-21	9.45e-20	36.4769
ARHGEF28	0.768538	2.29055	9.81698	6.96e-21	9.51e-20	36.4697
ABCA4	-0.436397	0.989735	-9.81546	7.05e-21	9.63e-20	36.4572
FAM186B	0.178731	0.433421	9.81428	7.12e-21	9.71e-20	36.4475
DHRS9	-0.862152	1.41692	-9.81311	7.19e-21	9.8e-20	36.438
RARRES2	-1.29421	4.77381	-9.80764	7.52e-21	1.02e-19	36.3932
C6orf136	0.357334	4.65243	9.80562	7.65e-21	1.04e-19	36.3767
B2M	-0.797362	10.8017	-9.80354	7.78e-21	1.06e-19	36.3597
BATF3	-0.607341	1.62499	-9.80229	7.86e-21	1.07e-19	36.3495
BEGAIN	0.226252	0.362154	9.80121	7.93e-21	1.08e-19	36.3406
PROX1	0.796218	1.82991	9.78961	8.73e-21	1.18e-19	36.2458
ADCY9	0.589288	4.8173	9.78537	9.04e-21	1.23e-19	36.2112
ABCC3	-1.11341	4.73839	-9.78526	9.05e-21	1.23e-19	36.2103
EHBP1L1	-0.653843	4.40324	-9.78458	9.1e-21	1.23e-19	36.2048
FHAD1	0.476686	0.965056	9.78076	9.39e-21	1.27e-19	36.1736
TCIRG1	-0.58148	5.69814	-9.7794	9.5e-21	1.28e-19	36.1624
SYT14	-0.714105	2.60316	-9.7765	9.73e-21	1.31e-19	36.1388
MTMR4	0.554142	3.90648	9.77116	1.02e-20	1.37e-19	36.0952
ROBO4	0.783742	3.93478	9.77064	1.02e-20	1.38e-19	36.0909
FOXJ1	1.16654	1.56325	9.76998	1.03e-20	1.38e-19	36.0856
ZNF622	-0.435271	6.21156	-9.76918	1.03e-20	1.39e-19	36.0791
C4B	-1.00824	4.8501	-9.76772	1.05e-20	1.41e-19	36.0671
SLC15A1	0.481391	0.474257	9.76607	1.06e-20	1.43e-19	36.0537
CDH26	0.167902	0.392971	9.758	1.13e-20	1.52e-19	35.9879
TP53I11	0.764353	4.57416	9.75721	1.14e-20	1.53e-19	35.9814
PITPNC1	0.626852	3.15584	9.75709	1.14e-20	1.53e-19	35.9805
CA14	0.475108	1.43395	9.75551	1.16e-20	1.55e-19	35.9676
LRRC2	0.853735	4.01889	9.75512	1.16e-20	1.55e-19	35.9644
RTN4	-0.458118	6.74693	-9.75393	1.17e-20	1.57e-19	35.9547
PTPN4	0.612409	3.35777	9.75382	1.17e-20	1.57e-19	35.9538
TMEM161A	0.551756	5.08502	9.7455	1.26e-20	1.68e-19	35.886
PPIC	0.470702	6.16757	9.74457	1.27e-20	1.69e-19	35.8784
AVPI1	-0.551732	5.29554	-9.74394	1.27e-20	1.7e-19	35.8733
FAM181B	0.565407	0.870527	9.74313	1.28e-20	1.71e-19	35.8667
MED15	-0.434183	4.91423	-9.7401	1.31e-20	1.75e-19	35.842
IRS4	0.542178	0.429237	9.73321	1.39e-20	1.85e-19	35.786
TUNAR	1.01219	0.581547	9.73203	1.4e-20	1.87e-19	35.7764
EDA	0.934217	1.89498	9.73167	1.41e-20	1.87e-19	35.7734
FBXL16	-0.916333	4.73572	-9.73018	1.43e-20	1.89e-19	35.7613
DEFB131A	0.93255	1.98767	9.72473	1.49e-20	1.98e-19	35.7169
CD82	-0.644293	5.26839	-9.72348	1.51e-20	2e-19	35.7068
RDH11	0.483803	5.71362	9.72285	1.51e-20	2.01e-19	35.7017
LIF	-0.924892	3.48171	-9.72258	1.52e-20	2.01e-19	35.6995
PARP4	-0.758927	6.17875	-9.71999	1.55e-20	2.05e-19	35.6785
CDH4	-1.24286	2.49352	-9.71565	1.61e-20	2.12e-19	35.6432
PLAG1	-0.931839	3.23316	-9.71434	1.62e-20	2.14e-19	35.6325
SLC9A5	-0.525721	1.55719	-9.7127	1.65e-20	2.17e-19	35.6192
AQP9	-0.697661	1.17183	-9.71077	1.67e-20	2.2e-19	35.6035
LZTS2	-0.49681	6.05969	-9.70999	1.68e-20	2.22e-19	35.5972
GOLGA8K	0.24081	0.323706	9.70848	1.7e-20	2.24e-19	35.5849
C17orf50	0.38921	0.691282	9.70673	1.73e-20	2.27e-19	35.5707
UBE2E2	-0.525243	5.04953	-9.70609	1.74e-20	2.28e-19	35.5654
UCP2	-0.84399	8.2965	-9.70403	1.77e-20	2.32e-19	35.5488
EEF1B2	-0.459532	8.49233	-9.70124	1.81e-20	2.37e-19	35.5261
NTAN1	-0.402284	3.19241	-9.6996	1.83e-20	2.4e-19	35.5128
CACNA2D2	0.965684	2.59562	9.69676	1.88e-20	2.46e-19	35.4897
AHNAK	-0.766757	6.67551	-9.6937	1.92e-20	2.52e-19	35.4649
ALKAL2	-0.917703	1.88363	-9.69001	1.98e-20	2.59e-19	35.435
TTC39B	-0.670113	3.37223	-9.68786	2.02e-20	2.64e-19	35.4175
CBX8	0.460147	2.88718	9.68768	2.02e-20	2.64e-19	35.416
PLXNA3	-0.558048	4.32503	-9.68322	2.1e-20	2.74e-19	35.3799
OSGIN2	-0.517805	4.65789	-9.68255	2.11e-20	2.75e-19	35.3744
ALDH1A1	1.08537	7.21921	9.6795	2.16e-20	2.82e-19	35.3497
CDK2AP2	0.56519	7.18694	9.67822	2.19e-20	2.85e-19	35.3393
PSD3	-0.852375	4.4938	-9.67356	2.27e-20	2.95e-19	35.3015
ZNRF2	-0.579711	4.70662	-9.67001	2.34e-20	3.04e-19	35.2728
PAPPA	-0.613211	1.13225	-9.66873	2.36e-20	3.07e-19	35.2624
LRRTM1	1.00215	0.925444	9.66592	2.42e-20	3.14e-19	35.2396
CHST15	-0.697475	5.41683	-9.66185	2.5e-20	3.24e-19	35.2067
SLA	0.804454	3.45197	9.65601	2.62e-20	3.4e-19	35.1594
HORMAD2	-0.148092	0.197684	-9.65476	2.65e-20	3.43e-19	35.1493
KLC3	-0.628745	1.4325	-9.65194	2.71e-20	3.51e-19	35.1264
PDZK1IP1	-1.9755	5.60584	-9.65177	2.71e-20	3.51e-19	35.1251
DGAT2L6	-0.208292	0.266665	-9.6508	2.74e-20	3.54e-19	35.1172
INSYN2B	0.644794	0.442534	9.64692	2.82e-20	3.65e-19	35.0858
METTL23	0.401005	4.71484	9.64604	2.84e-20	3.67e-19	35.0788
ARF6	-0.456504	6.75014	-9.64003	2.99e-20	3.85e-19	35.0302
ADGRF4	-0.723615	0.746046	-9.635	3.11e-20	4.01e-19	34.9895
H4C8	0.977903	3.02532	9.63329	3.16e-20	4.06e-19	34.9757
ESRRG	0.597858	1.37482	9.63235	3.18e-20	4.09e-19	34.9681
RPS4X	-0.483585	11.2895	-9.62898	3.27e-20	4.2e-19	34.9409
PLAU	-1.45721	6.35469	-9.62333	3.43e-20	4.4e-19	34.8952
DCUN1D3	-0.540416	3.49146	-9.62191	3.47e-20	4.45e-19	34.8837
MTFR1L	0.398271	4.62075	9.61957	3.53e-20	4.53e-19	34.8649
PRPS2	-0.491923	5.52179	-9.61389	3.7e-20	4.74e-19	34.819
CD1C	-1.12047	1.98387	-9.61361	3.71e-20	4.75e-19	34.8167
NDUFA8	0.374138	7.29849	9.61272	3.74e-20	4.78e-19	34.8096
RFLNB	0.752323	4.44233	9.61153	3.77e-20	4.82e-19	34.8
GOLGA8S	0.128912	0.154792	9.61103	3.79e-20	4.84e-19	34.7959
TGFA	-0.931072	5.79918	-9.60703	3.91e-20	5e-19	34.7637
C12orf76	-0.411847	3.55603	-9.5992	4.17e-20	5.32e-19	34.7005
FBF1	0.682902	2.8987	9.59832	4.2e-20	5.36e-19	34.6934
PDIA5	0.702454	4.81533	9.59614	4.28e-20	5.45e-19	34.6758
KLK5	-1.14219	1.2597	-9.59193	4.43e-20	5.64e-19	34.6419
IER2	0.895962	6.54806	9.58678	4.62e-20	5.87e-19	34.6004
SAMD11	-1.12125	2.72483	-9.58671	4.62e-20	5.87e-19	34.5998
CCDC9B	0.742722	3.67025	9.58346	4.74e-20	6.02e-19	34.5737
CD151	-0.612788	7.7294	-9.5822	4.79e-20	6.08e-19	34.5635
SLC25A20	0.51957	4.67522	9.57716	4.99e-20	6.33e-19	34.523
ALDH4A1	0.733766	3.66847	9.57411	5.12e-20	6.49e-19	34.4984
COQ9	0.462735	5.02113	9.57328	5.15e-20	6.53e-19	34.4917
VEGFB	0.388336	7.00391	9.5732	5.16e-20	6.53e-19	34.4911
KHDRBS3	-0.505025	1.91299	-9.57077	5.26e-20	6.65e-19	34.4715
SIAH2	-0.452788	4.45299	-9.56904	5.34e-20	6.74e-19	34.4576
NEK5	0.220074	0.599526	9.56847	5.36e-20	6.77e-19	34.4531
RAD51D	0.316693	2.19733	9.56762	5.4e-20	6.81e-19	34.4462
SSPN	-0.812779	4.28452	-9.56659	5.44e-20	6.86e-19	34.4379
CCDC149	0.431569	2.87855	9.56501	5.51e-20	6.95e-19	34.4252
CTH	0.597521	2.54625	9.56362	5.58e-20	7.02e-19	34.4141
SNAPC2	-0.458106	5.23959	-9.56326	5.59e-20	7.03e-19	34.4111
PLCD1	-0.539702	4.91093	-9.55998	5.74e-20	7.22e-19	34.3848
CITED4	-0.747272	4.97866	-9.54621	6.43e-20	8.07e-19	34.2741
SH2D3A	-0.524978	3.88296	-9.54572	6.45e-20	8.1e-19	34.2702
NOL4	0.559851	0.494958	9.54335	6.58e-20	8.25e-19	34.2512
PGP	0.419384	4.2108	9.53426	7.08e-20	8.87e-19	34.1782
ACTN1	-0.63874	5.23228	-9.53237	7.19e-20	9e-19	34.163
LPGAT1	0.533851	4.89958	9.52999	7.33e-20	9.17e-19	34.1439
SLC35B1	0.465675	4.96992	9.5285	7.42e-20	9.28e-19	34.132
B4GALT5	-0.650531	5.47363	-9.52823	7.44e-20	9.29e-19	34.1298
COX6C	0.451108	6.36005	9.52267	7.78e-20	9.71e-19	34.0852
CDO1	-1.40263	3.51272	-9.5199	7.96e-20	9.93e-19	34.063
HLA-DQB2	-1.46313	4.89584	-9.51622	8.2e-20	1.02e-18	34.0335
JAKMIP3	0.144247	0.175104	9.51584	8.22e-20	1.02e-18	34.0305
MAB21L4	-0.541997	0.774927	-9.51455	8.31e-20	1.03e-18	34.0201
FAP	-0.860768	1.50836	-9.51034	8.6e-20	1.07e-18	33.9864
ARSJ	-0.815983	1.81408	-9.50921	8.68e-20	1.08e-18	33.9773
PPM1N	-0.562272	1.14217	-9.50544	8.95e-20	1.11e-18	33.9471
REEP2	-0.75322	2.31922	-9.50276	9.14e-20	1.13e-18	33.9257
MRPS26	0.47864	7.36383	9.49893	9.43e-20	1.17e-18	33.895
PTPRQ	0.413104	0.380755	9.49658	9.61e-20	1.19e-18	33.8763
AKIRIN2	-0.387069	5.90291	-9.49594	9.66e-20	1.2e-18	33.8711
ATG10	0.401574	2.7544	9.48803	1.03e-19	1.28e-18	33.8078
SLC25A39	0.363876	7.24313	9.48632	1.04e-19	1.29e-18	33.7941
RADIL	0.479167	0.707389	9.48569	1.05e-19	1.3e-18	33.7891
RTP3	0.21937	0.199181	9.48493	1.06e-19	1.3e-18	33.783
METTL24	0.498743	0.575934	9.48304	1.07e-19	1.32e-18	33.768
SPAAR	0.465938	1.30373	9.47239	1.17e-19	1.44e-18	33.6828
AACS	0.399807	2.83556	9.47138	1.18e-19	1.45e-18	33.6747
MARVELD2	0.585603	5.12701	9.46884	1.2e-19	1.48e-18	33.6545
KIF5C	0.499443	0.596951	9.46804	1.21e-19	1.49e-18	33.648
ENO3	0.966717	2.78115	9.46206	1.27e-19	1.56e-18	33.6003
DHODH	0.334202	2.36799	9.46037	1.29e-19	1.58e-18	33.5869
NR2C2AP	-0.372393	4.45469	-9.45993	1.29e-19	1.59e-18	33.5833
ITGA9	-0.833794	5.93176	-9.45886	1.3e-19	1.6e-18	33.5748
APOM	0.483955	2.72871	9.45857	1.31e-19	1.6e-18	33.5725
H2AW	-1.30983	3.38323	-9.4425	1.49e-19	1.82e-18	33.4443
SLC10A4	0.4913	0.855359	9.44001	1.52e-19	1.86e-18	33.4244
FHOD3	0.727272	1.71834	9.4367	1.56e-19	1.91e-18	33.398
RPS6KL1	0.453073	1.06451	9.43389	1.6e-19	1.95e-18	33.3757
NR1I3	0.118553	0.260507	9.43386	1.6e-19	1.95e-18	33.3754
PABPC4	-0.374991	5.31052	-9.43293	1.61e-19	1.96e-18	33.368
MYO10	0.596113	4.31816	9.42384	1.73e-19	2.11e-18	33.2956
CAST	-0.534	5.79872	-9.42367	1.73e-19	2.11e-18	33.2943
NAMPT	-0.658637	4.47873	-9.42354	1.74e-19	2.11e-18	33.2933
KISS1R	-0.510967	0.998492	-9.42061	1.78e-19	2.16e-18	33.27
TM4SF18	0.789185	3.52822	9.41448	1.87e-19	2.27e-18	33.2212
TRIM17	-0.509447	1.50948	-9.40926	1.95e-19	2.37e-18	33.1796
RNF149	-0.365118	4.81454	-9.40743	1.98e-19	2.4e-18	33.1651
NIPAL2	-0.48788	3.78374	-9.40735	1.98e-19	2.4e-18	33.1645
TSPAN18	1.05747	4.33054	9.4061	2e-19	2.42e-18	33.1546
ACBD7	-0.930792	3.63766	-9.40439	2.02e-19	2.45e-18	33.1409
SYTL3	0.676789	4.58006	9.40433	2.03e-19	2.45e-18	33.1405
ZNRF3	-0.560166	3.82173	-9.40401	2.03e-19	2.46e-18	33.1379
LHFPL1	0.598956	1.13137	9.40394	2.03e-19	2.46e-18	33.1373
DGAT2	1.05682	3.12829	9.40161	2.07e-19	2.5e-18	33.1189
NCF2	-0.92996	3.41038	-9.40147	2.07e-19	2.5e-18	33.1178
NELL2	-1.78895	5.71341	-9.39786	2.13e-19	2.58e-18	33.089
CTF1	-0.757983	5.1936	-9.39713	2.15e-19	2.59e-18	33.0833
P2RX3	0.201864	0.189413	9.39713	2.15e-19	2.59e-18	33.0832
SLC6A4	0.195849	0.240292	9.39512	2.18e-19	2.63e-18	33.0673
CDK7	-0.366086	5.26211	-9.39203	2.24e-19	2.69e-18	33.0428
ETV7	-0.892948	2.59326	-9.38988	2.28e-19	2.74e-18	33.0257
GRB14	0.582522	2.03384	9.38637	2.34e-19	2.81e-18	32.9978
IL4I1	-1.06458	2.37067	-9.38296	2.41e-19	2.89e-18	32.9707
AKT3	-0.555362	4.094	-9.38094	2.44e-19	2.93e-18	32.9547
COX6A1	0.466777	5.75383	9.37435	2.58e-19	3.09e-18	32.9024
CCM2	-0.406306	4.70737	-9.37423	2.58e-19	3.09e-18	32.9015
GNAZ	-0.594891	2.64127	-9.37419	2.58e-19	3.09e-18	32.9011
TSC22D1	-1.10978	7.89528	-9.37232	2.62e-19	3.14e-18	32.8863
NR2F1	-0.904187	3.61769	-9.37198	2.63e-19	3.14e-18	32.8836
PSAT1	1.20713	3.62027	9.36921	2.69e-19	3.21e-18	32.8617
BRSK2	0.332177	0.469277	9.36689	2.74e-19	3.27e-18	32.8433
FAM240A	0.16418	0.113324	9.36643	2.75e-19	3.28e-18	32.8396
IFIT3	-0.758147	5.11594	-9.36204	2.85e-19	3.39e-18	32.8048
SNAP91	0.408234	0.354154	9.36051	2.88e-19	3.43e-18	32.7927
ETV4	-0.968297	5.26656	-9.3605	2.88e-19	3.43e-18	32.7926
GOLGA8T	0.168639	0.198787	9.357	2.96e-19	3.53e-18	32.7649
JPH1	-0.677591	2.88309	-9.3542	3.03e-19	3.6e-18	32.7427
EIF2B2	0.499867	4.70744	9.35026	3.13e-19	3.72e-18	32.7116
RASGRP3	0.593824	2.57592	9.34931	3.15e-19	3.74e-18	32.704
ANAPC15	0.374143	2.45984	9.3492	3.15e-19	3.74e-18	32.7032
MMP11	-1.14766	2.99482	-9.34839	3.18e-19	3.76e-18	32.6967
PIAS2	0.360457	2.7434	9.34481	3.27e-19	3.87e-18	32.6683
MAGEL2	0.604746	0.823327	9.34423	3.28e-19	3.89e-18	32.6638
NEXN	0.75359	2.31577	9.34366	3.3e-19	3.9e-18	32.6592
PKM	-0.491594	8.28714	-9.33867	3.43e-19	4.06e-18	32.6198
PHF20L1	0.473067	2.93352	9.33355	3.58e-19	4.23e-18	32.5793
ATP6V1FNB	-0.357554	0.827066	-9.33305	3.59e-19	4.24e-18	32.5753
STMN3	0.677601	6.48758	9.33093	3.65e-19	4.31e-18	32.5586
GFOD2	0.52385	2.98971	9.33028	3.67e-19	4.33e-18	32.5535
OPTN	-0.421615	5.37706	-9.32886	3.71e-19	4.38e-18	32.5422
CFAP299	0.088719	0.0967258	9.32544	3.82e-19	4.49e-18	32.5152
AK4	-0.548572	2.31335	-9.32464	3.84e-19	4.52e-18	32.5089
NFKBIE	-0.496653	4.3593	-9.32253	3.91e-19	4.59e-18	32.4922
CCSAP	-0.386273	2.36883	-9.31944	4e-19	4.7e-18	32.4678
DDB2	-0.455326	4.4302	-9.31852	4.03e-19	4.74e-18	32.4606
EFCAB12	0.431411	0.949654	9.31813	4.05e-19	4.75e-18	32.4574
GIPC3	0.677832	2.71139	9.31802	4.05e-19	4.75e-18	32.4566
LDHA	-0.491418	7.48005	-9.31487	4.15e-19	4.87e-18	32.4317
NIBAN1	-0.931392	3.89008	-9.31424	4.17e-19	4.89e-18	32.4267
CCDC160	0.227394	0.285476	9.31247	4.23e-19	4.95e-18	32.4127
TCFL5	0.58055	3.99296	9.31243	4.24e-19	4.95e-18	32.4124
TMEM171	0.990017	3.96037	9.31129	4.27e-19	4.99e-18	32.4034
GPAT3	0.752069	4.51619	9.30975	4.33e-19	5.05e-18	32.3913
BANK1	0.655444	3.5654	9.3073	4.41e-19	5.15e-18	32.372
ZDHHC11B	0.446494	1.01831	9.30309	4.56e-19	5.32e-18	32.3387
FGF11	0.179506	0.186614	9.30114	4.64e-19	5.4e-18	32.3233
ARHGAP19	-0.861091	3.65486	-9.29826	4.74e-19	5.52e-18	32.3006
UAP1	-0.493221	5.21775	-9.29743	4.77e-19	5.56e-18	32.2941
SMIM32	0.6744	0.469097	9.29676	4.8e-19	5.58e-18	32.2888
TRMT10A	0.395099	2.45609	9.29657	4.81e-19	5.59e-18	32.2873
CXCL14	-2.65736	6.54521	-9.29174	5e-19	5.8e-18	32.2492
IFNAR2	-0.216267	0.684815	-9.28735	5.18e-19	6.01e-18	32.2146
KCTD15	0.683994	3.64796	9.28624	5.22e-19	6.06e-18	32.2059
LRP1	-0.695829	4.70244	-9.28292	5.36e-19	6.21e-18	32.1797
CLEC16A	-0.434744	4.10917	-9.2828	5.37e-19	6.22e-18	32.1788
ACOT6	0.0860945	0.0790791	9.27927	5.52e-19	6.39e-18	32.151
MRPS33	0.415222	4.60116	9.27657	5.64e-19	6.52e-18	32.1297
ANKK1	0.387563	0.574828	9.27052	5.92e-19	6.84e-18	32.0821
COQ4	0.499194	5.76069	9.26901	5.99e-19	6.92e-18	32.0702
SLC9C1	0.336301	0.571939	9.26828	6.03e-19	6.95e-18	32.0644
KMT5A	0.453541	4.84592	9.26725	6.08e-19	7.01e-18	32.0563
FREM2	0.816532	2.56568	9.26688	6.09e-19	7.02e-18	32.0535
INPP4A	-0.485084	3.5283	-9.26493	6.19e-19	7.13e-18	32.0381
GNG7	0.384622	3.64237	9.26444	6.21e-19	7.15e-18	32.0342
PPP2R3A	-0.460436	2.79946	-9.26428	6.22e-19	7.16e-18	32.033
SDR16C5	-0.782018	0.949283	-9.26164	6.35e-19	7.3e-18	32.0122
ATF7IP2	0.563395	2.40482	9.26029	6.42e-19	7.38e-18	32.0016
SLC6A20	-1.23518	1.55402	-9.2588	6.5e-19	7.46e-18	31.9899
RBM17	-0.366133	5.45274	-9.2571	6.59e-19	7.56e-18	31.9765
RGS4	-1.24801	2.16906	-9.25572	6.66e-19	7.64e-18	31.9656
MBLAC1	0.475435	2.42342	9.24558	7.22e-19	8.27e-18	31.886
TNFRSF10A	-0.649061	3.39538	-9.24302	7.37e-19	8.44e-18	31.8659
LCMT1	-0.35808	5.85316	-9.24258	7.39e-19	8.46e-18	31.8624
CLCF1	-0.833085	4.71638	-9.24218	7.42e-19	8.48e-18	31.8593
LMNTD2	0.554594	1.67138	9.24216	7.42e-19	8.48e-18	31.8591
PFKFB2	0.787359	4.4731	9.2399	7.55e-19	8.63e-18	31.8414
HSBP1	0.382653	5.32859	9.23849	7.64e-19	8.72e-18	31.8303
KRT222	0.65245	0.805952	9.23526	7.84e-19	8.94e-18	31.8049
ECSIT	0.439865	5.40937	9.23499	7.85e-19	8.95e-18	31.8028
CCL23	-0.636901	1.14138	-9.23437	7.89e-19	8.99e-18	31.798
SPAG5	0.613101	2.18346	9.23197	8.05e-19	9.16e-18	31.7791
SRGAP2	-0.478025	2.57799	-9.22865	8.26e-19	9.39e-18	31.7531
NPR3	1.15057	2.36115	9.22726	8.35e-19	9.49e-18	31.7422
SLC6A6	-0.826394	4.62853	-9.22676	8.39e-19	9.52e-18	31.7382
SEZ6L2	-1.33188	4.23262	-9.22596	8.44e-19	9.58e-18	31.732
FRMPD2	0.486985	0.786483	9.22423	8.56e-19	9.7e-18	31.7184
GPIHBP1	0.768504	2.21231	9.22337	8.61e-19	9.76e-18	31.7117
TTC30B	0.506242	3.10502	9.21771	9.01e-19	1.02e-17	31.6673
INPPL1	0.405547	5.7443	9.21646	9.1e-19	1.03e-17	31.6575
PLPPR3	-0.293375	0.379829	-9.21465	9.23e-19	1.04e-17	31.6434
HROB	-0.308448	1.28462	-9.2127	9.38e-19	1.06e-17	31.628
FLT1	0.896455	5.00908	9.21064	9.53e-19	1.08e-17	31.6119
PABPC1	-0.459195	7.9451	-9.21011	9.57e-19	1.08e-17	31.6078
PRKCA	0.635188	1.92845	9.20304	1.01e-18	1.14e-17	31.5524
PLAAT3	-0.480267	6.63284	-9.20184	1.02e-18	1.15e-17	31.543
STAT5A	-0.40843	4.53091	-9.20141	1.03e-18	1.16e-17	31.5396
HPD	0.238707	0.624928	9.19865	1.05e-18	1.18e-17	31.518
WFS1	0.680369	5.2925	9.19619	1.07e-18	1.2e-17	31.4988
CFTR	-0.3306	0.344864	-9.19505	1.08e-18	1.21e-17	31.4898
PRDX5	0.478473	10.6052	9.19438	1.08e-18	1.22e-17	31.4846
FZD9	0.237155	0.345967	9.1943	1.09e-18	1.22e-17	31.484
KCNK17	1.15974	1.94335	9.19303	1.1e-18	1.23e-17	31.4741
MED20	0.389279	4.22568	9.19239	1.1e-18	1.24e-17	31.469
PEA15	-0.392271	7.97628	-9.18798	1.14e-18	1.28e-17	31.4345
CSRP2	0.585572	3.39744	9.18476	1.17e-18	1.31e-17	31.4093
KHDRBS2	0.985391	1.91178	9.18454	1.17e-18	1.31e-17	31.4076
C1orf194	0.358586	0.344989	9.18112	1.2e-18	1.35e-17	31.3809
FAM229B	0.440676	4.44675	9.17908	1.22e-18	1.37e-17	31.365
ZNF804B	0.832206	0.693354	9.17907	1.22e-18	1.37e-17	31.3649
GPER1	0.827683	3.78226	9.1673	1.34e-18	1.5e-17	31.2729
SH3RF3	0.60701	2.16718	9.16313	1.39e-18	1.55e-17	31.2404
TMEM253	0.2193	0.291803	9.16292	1.39e-18	1.55e-17	31.2387
ZFP36L1	-0.765387	8.89894	-9.16157	1.41e-18	1.57e-17	31.2282
CCDC40	0.42569	1.76391	9.16057	1.42e-18	1.58e-17	31.2203
PTK2B	-0.686189	5.33954	-9.15718	1.46e-18	1.62e-17	31.1939
HAPLN3	-0.835272	3.15274	-9.15658	1.46e-18	1.63e-17	31.1892
NABP1	-0.512556	1.27108	-9.15125	1.53e-18	1.7e-17	31.1477
TRPC6	0.725989	2.81969	9.14927	1.55e-18	1.72e-17	31.1322
TUBB8	0.316334	0.453253	9.1489	1.55e-18	1.72e-17	31.1294
C16orf96	0.272277	0.541799	9.14882	1.56e-18	1.72e-17	31.1287
TMEM47	0.805254	4.19603	9.14831	1.56e-18	1.73e-17	31.1248
GBA2	0.418019	5.47083	9.14583	1.59e-18	1.76e-17	31.1054
LRRN2	0.875584	2.41992	9.14562	1.6e-18	1.76e-17	31.1038
DCHS2	-0.354378	0.566097	-9.14558	1.6e-18	1.76e-17	31.1035
RPS6KA6	0.637727	2.41626	9.1443	1.61e-18	1.78e-17	31.0935
TENM2	0.507538	0.433303	9.13967	1.67e-18	1.85e-17	31.0574
ISOC2	0.47124	4.92333	9.13931	1.68e-18	1.85e-17	31.0546
PLA2R1	0.937261	2.54494	9.12817	1.83e-18	2.02e-17	30.9679
UGCG	-0.495432	4.43679	-9.12429	1.89e-18	2.08e-17	30.9376
CD1E	-1.07685	1.81944	-9.12177	1.93e-18	2.12e-17	30.918
EMP3	-0.755592	6.4736	-9.11444	2.04e-18	2.25e-17	30.861
TRMT9B	0.718132	3.31097	9.11389	2.05e-18	2.25e-17	30.8567
SH2D4A	-0.567056	5.59195	-9.11002	2.11e-18	2.32e-17	30.8267
FAM178B	-0.738159	1.57108	-9.10609	2.18e-18	2.39e-17	30.7961
CNKSR2	-0.207246	0.329735	-9.10421	2.21e-18	2.43e-17	30.7815
NRG2	0.294064	0.428256	9.10287	2.23e-18	2.45e-17	30.7711
ACSL5	-0.81093	4.0687	-9.09958	2.29e-18	2.52e-17	30.7455
FAM110B	-0.628503	4.04178	-9.09915	2.3e-18	2.52e-17	30.7422
FNDC11	-0.437509	0.896294	-9.098	2.32e-18	2.54e-17	30.7332
MELTF	-0.825998	3.15599	-9.09775	2.33e-18	2.55e-17	30.7313
HEMGN	0.233872	0.17057	9.09717	2.34e-18	2.56e-17	30.7268
ABCB8	0.361559	3.85289	9.0958	2.36e-18	2.58e-17	30.7162
SMIM29	-0.425717	6.16312	-9.09496	2.38e-18	2.6e-17	30.7096
TREX2	0.339646	0.623284	9.0881	2.51e-18	2.74e-17	30.6564
ADGRF1	-0.908826	3.55581	-9.08709	2.53e-18	2.76e-17	30.6485
RBPMS2	0.628851	4.29285	9.08347	2.6e-18	2.84e-17	30.6205
CYP7B1	0.741184	3.12766	9.08166	2.64e-18	2.88e-17	30.6064
NET1	-0.663263	5.62548	-9.07796	2.72e-18	2.96e-17	30.5777
HSP90B1	0.653739	9.84815	9.07563	2.77e-18	3.01e-17	30.5597
MEAF6	-0.460959	5.88386	-9.07403	2.8e-18	3.05e-17	30.5473
CTTN	-0.403715	7.23939	-9.07151	2.86e-18	3.11e-17	30.5278
TMEM53	-0.338752	3.53595	-9.06815	2.94e-18	3.19e-17	30.5017
PARP14	-0.604624	5.6901	-9.06776	2.95e-18	3.2e-17	30.4986
FAM241A	0.461179	2.37051	9.06577	2.99e-18	3.25e-17	30.4833
TUBA4A	-0.625226	5.10763	-9.06522	3.01e-18	3.26e-17	30.479
TREH	0.52629	0.662602	9.06215	3.08e-18	3.34e-17	30.4552
JHY	0.363126	2.26365	9.06028	3.12e-18	3.38e-17	30.4407
CH25H	-1.14622	3.08883	-9.06011	3.13e-18	3.38e-17	30.4394
HLA-C	-0.719545	10.2199	-9.05958	3.14e-18	3.4e-17	30.4353
LAMC3	0.564829	0.788271	9.05453	3.27e-18	3.53e-17	30.3962
CFAP47	0.171926	0.112407	9.05118	3.36e-18	3.62e-17	30.3703
KLF5	-0.810816	6.21372	-9.0502	3.38e-18	3.65e-17	30.3627
CAPS2	0.409093	1.7615	9.04839	3.43e-18	3.7e-17	30.3487
TNFRSF11B	1.23351	5.01847	9.04717	3.46e-18	3.73e-17	30.3393
DOCK11	-0.656372	4.71429	-9.04547	3.51e-18	3.78e-17	30.3261
ITGB2	-0.978895	4.65105	-9.04235	3.6e-18	3.87e-17	30.302
SYNGR3	-0.436808	0.919793	-9.04216	3.6e-18	3.87e-17	30.3005
TEC	-0.396271	2.74039	-9.0414	3.62e-18	3.9e-17	30.2947
NPY1R	-0.824263	2.65513	-9.03892	3.69e-18	3.97e-17	30.2755
AGTR1	0.823382	1.14407	9.03763	3.73e-18	4.01e-17	30.2655
PRCD	0.182433	0.478684	9.03756	3.73e-18	4.01e-17	30.2649
QPRT	1.16231	3.4039	9.03547	3.8e-18	4.07e-17	30.2488
PLA2G4F	0.879054	1.61877	9.03262	3.88e-18	4.16e-17	30.2268
PLXNB2	-0.586684	8.31117	-9.0316	3.91e-18	4.19e-17	30.2189
MAL2	-0.530081	7.46745	-9.02589	4.09e-18	4.38e-17	30.1748
PSPH	0.546306	3.95951	9.02496	4.12e-18	4.41e-17	30.1676
PSG8	-1.01735	0.865942	-9.02385	4.16e-18	4.44e-17	30.159
NFS1	0.308574	3.1151	9.01901	4.32e-18	4.61e-17	30.1217
TNFRSF1B	-0.64613	5.31655	-9.01639	4.41e-18	4.71e-17	30.1015
FABP4	1.61928	3.08476	9.01613	4.42e-18	4.71e-17	30.0994
MAP4	-0.433163	5.86307	-9.0147	4.47e-18	4.76e-17	30.0884
EDN3	1.77191	2.74078	9.01389	4.49e-18	4.79e-17	30.0822
SPTY2D1OS	0.25954	1.15802	9.01307	4.52e-18	4.82e-17	30.0758
LMO7	-0.604208	5.20714	-9.01071	4.61e-18	4.9e-17	30.0576
CDKAL1	-0.414947	4.27526	-9.0076	4.72e-18	5.02e-17	30.0336
DNMT3B	0.416805	1.72739	9.00683	4.75e-18	5.05e-17	30.0277
KLHL8	0.557667	3.88883	8.99685	5.13e-18	5.45e-17	29.9508
MYCN	0.646657	1.57149	8.99631	5.16e-18	5.47e-17	29.9466
TBX2	0.863939	3.238	8.99476	5.22e-18	5.54e-17	29.9347
WBP2	-0.340166	7.07152	-8.99426	5.24e-18	5.56e-17	29.9308
SLC4A3	0.632527	1.9457	8.99071	5.39e-18	5.71e-17	29.9035
TMEM150C	0.601707	3.88225	8.98797	5.5e-18	5.83e-17	29.8824
MNDA	-0.835405	3.5499	-8.98562	5.6e-18	5.93e-17	29.8643
SNX11	0.408093	4.64441	8.98459	5.65e-18	5.98e-17	29.8564
GCAT	0.520646	4.95998	8.98424	5.67e-18	5.99e-17	29.8537
CDH6	-0.950747	3.35245	-8.98311	5.72e-18	6.04e-17	29.845
EML6	0.451241	1.22181	8.98296	5.72e-18	6.04e-17	29.8438
ALDH1B1	0.63767	4.50318	8.98005	5.85e-18	6.18e-17	29.8214
PDE11A	0.328188	0.460697	8.97949	5.88e-18	6.2e-17	29.8171
SP110	-0.406189	3.14354	-8.97603	6.04e-18	6.37e-17	29.7905
MEX3A	-0.680645	1.98337	-8.96841	6.41e-18	6.75e-17	29.7319
AMIGO2	-0.989524	4.5757	-8.96817	6.42e-18	6.76e-17	29.73
LAMA1	-0.853003	2.47242	-8.96764	6.45e-18	6.78e-17	29.726
KDR	0.919974	5.35566	8.96699	6.48e-18	6.81e-17	29.721
MARCHF11	-0.481804	0.48124	-8.96649	6.51e-18	6.84e-17	29.7171
MT1HL1	0.498193	0.412248	8.96088	6.8e-18	7.14e-17	29.6741
TRERF1	0.453274	1.93893	8.95569	7.08e-18	7.43e-17	29.6341
FOSL2	-0.757257	5.44031	-8.95381	7.18e-18	7.53e-17	29.6198
NPIPB9	0.146822	0.224717	8.95356	7.2e-18	7.54e-17	29.6178
NT5E	-1.06837	5.98398	-8.95339	7.21e-18	7.55e-17	29.6165
GTF3C1	0.552934	5.53651	8.95286	7.24e-18	7.57e-17	29.6124
NDUFB2	0.499118	5.99201	8.94795	7.52e-18	7.86e-17	29.5748
IGSF22	0.270091	1.03912	8.94553	7.66e-18	8.01e-17	29.5562
STARD13	0.660707	3.66823	8.94512	7.68e-18	8.03e-17	29.553
DUS2	0.289535	2.73787	8.94485	7.7e-18	8.04e-17	29.551
MEGF9	-0.771984	6.45428	-8.94438	7.73e-18	8.07e-17	29.5473
GPT2	0.597283	3.02791	8.93893	8.06e-18	8.41e-17	29.5056
RND2	0.848178	3.8765	8.93888	8.07e-18	8.41e-17	29.5051
C16orf46	0.0941374	0.147947	8.93742	8.16e-18	8.5e-17	29.494
TLCD3A	-0.427313	4.49138	-8.93631	8.23e-18	8.57e-17	29.4855
LYZ	-1.55697	5.76639	-8.93488	8.32e-18	8.66e-17	29.4745
RETN	-1.11707	1.52234	-8.93402	8.38e-18	8.71e-17	29.4679
LRRC4B	0.515683	1.30028	8.93302	8.44e-18	8.77e-17	29.4602
ECT2L	-0.282236	0.729495	-8.92979	8.66e-18	8.99e-17	29.4355
FAM107A	0.921997	5.07154	8.92839	8.75e-18	9.08e-17	29.4247
RGCC	0.872126	7.20933	8.92647	8.88e-18	9.21e-17	29.4101
SLC25A38	0.517855	6.49374	8.92608	8.91e-18	9.24e-17	29.407
SGK3	-0.574261	3.96633	-8.92358	9.09e-18	9.41e-17	29.3879
KLK13	-0.745148	1.84844	-8.9196	9.37e-18	9.7e-17	29.3574
COLEC12	-0.856795	1.91277	-8.91861	9.44e-18	9.77e-17	29.3498
UBQLN4	-0.455103	4.96731	-8.91791	9.49e-18	9.82e-17	29.3445
GNA15	-0.751911	2.34531	-8.9177	9.51e-18	9.83e-17	29.3428
CYC1	0.393536	7.02792	8.91573	9.66e-18	9.97e-17	29.3278
CAMSAP1	-0.509599	3.66676	-8.90933	1.01e-17	1.05e-16	29.2788
FZD4	0.611939	4.25688	8.90624	1.04e-17	1.07e-16	29.2552
SERINC5	-0.607787	3.92761	-8.90139	1.08e-17	1.11e-16	29.2181
GP9	0.190091	0.189131	8.90116	1.08e-17	1.11e-16	29.2163
SERPINB8	-0.549649	3.07369	-8.901	1.08e-17	1.11e-16	29.2151
RNF39	-0.623313	1.85919	-8.9009	1.08e-17	1.11e-16	29.2143
SYNPO	-0.568117	5.41372	-8.89683	1.12e-17	1.15e-16	29.1832
PNPLA6	-0.372468	5.13828	-8.89464	1.14e-17	1.17e-16	29.1665
TPPP	0.740261	2.56615	8.89376	1.15e-17	1.18e-16	29.1597
SRCIN1	-0.664592	2.76447	-8.89113	1.17e-17	1.2e-16	29.1396
CD24	0.594865	10.3256	8.88613	1.21e-17	1.25e-16	29.1015
ARHGAP18	-0.587728	5.71642	-8.88475	1.23e-17	1.26e-16	29.0909
PPIB	0.523613	8.03547	8.88417	1.23e-17	1.26e-16	29.0865
KCNJ1	0.639547	0.568349	8.88334	1.24e-17	1.27e-16	29.0801
MYO1H	0.172313	0.28537	8.8811	1.26e-17	1.29e-16	29.0631
TMEM14B	0.425885	5.11941	8.87998	1.27e-17	1.3e-16	29.0545
TBC1D24	0.396469	2.74492	8.87974	1.28e-17	1.3e-16	29.0527
MPZL3	-0.562738	4.94539	-8.87634	1.31e-17	1.34e-16	29.0268
VEPH1	0.318452	0.655728	8.87519	1.32e-17	1.35e-16	29.018
NNMT	-1.11482	3.92859	-8.87499	1.32e-17	1.35e-16	29.0164
DSP	-0.784131	7.40754	-8.87103	1.37e-17	1.39e-16	28.9862
TCEANC	0.301893	1.8019	8.86878	1.39e-17	1.42e-16	28.969
TACC2	0.558631	3.67252	8.86536	1.43e-17	1.45e-16	28.943
KLLN	0.32975	1.08874	8.8642	1.44e-17	1.47e-16	28.9341
RNF227	-0.370548	2.47822	-8.86191	1.47e-17	1.49e-16	28.9167
CMTM8	-0.520221	5.68494	-8.86035	1.48e-17	1.51e-16	28.9048
HID1	0.472429	3.91711	8.86001	1.49e-17	1.51e-16	28.9022
NEU4	0.272232	0.241952	8.8591	1.5e-17	1.52e-16	28.8952
ACADS	0.450802	5.28735	8.85812	1.51e-17	1.53e-16	28.8878
STMN2	-0.966644	1.47438	-8.85481	1.55e-17	1.57e-16	28.8626
AKR1E2	0.471177	1.00795	8.85471	1.55e-17	1.57e-16	28.8618
RASL10B	0.536713	1.17503	8.85398	1.56e-17	1.58e-16	28.8562
HLA-DRA	-1.12209	10.2011	-8.85054	1.6e-17	1.62e-16	28.83
ITGAM	-0.752857	2.8031	-8.84647	1.65e-17	1.67e-16	28.7991
SEMA4C	-0.530176	4.73258	-8.84226	1.71e-17	1.72e-16	28.767
HMGN5	0.543553	4.37369	8.84148	1.72e-17	1.73e-16	28.7611
LRRC8A	-0.495902	6.03815	-8.83373	1.82e-17	1.84e-16	28.7022
C4A	-1.01241	4.44263	-8.83111	1.86e-17	1.88e-16	28.6822
HEY1	0.570902	2.64108	8.82707	1.92e-17	1.93e-16	28.6516
PRUNE1	0.545156	5.56617	8.82522	1.94e-17	1.96e-16	28.6374
CABCOCO1	0.72048	0.882666	8.82492	1.95e-17	1.96e-16	28.6352
FGFBP1	-1.57699	2.71813	-8.82122	2.01e-17	2.02e-16	28.6071
EMCN	0.778691	4.20407	8.82039	2.02e-17	2.03e-16	28.6007
ZCCHC12	-2.25325	8.09977	-8.81882	2.04e-17	2.05e-16	28.5889
ATP2B4	-0.562217	5.39524	-8.8186	2.05e-17	2.06e-16	28.5872
ANAPC13	0.391486	6.44072	8.81168	2.16e-17	2.17e-16	28.5346
DUSP4	-0.811977	4.31045	-8.81142	2.16e-17	2.17e-16	28.5327
FH	0.356181	6.03596	8.81104	2.17e-17	2.18e-16	28.5297
SSTR3	-0.704333	1.26884	-8.80925	2.2e-17	2.21e-16	28.5162
RSAD2	-0.697529	3.10374	-8.80747	2.23e-17	2.23e-16	28.5027
ARNTL2	-0.581908	1.57446	-8.80643	2.25e-17	2.25e-16	28.4948
C3orf33	0.417388	2.22065	8.80079	2.35e-17	2.35e-16	28.452
ACVRL1	0.60703	4.39626	8.80044	2.35e-17	2.35e-16	28.4494
SPON1	-1.08122	1.90404	-8.79903	2.38e-17	2.38e-16	28.4386
PTAFR	-0.776803	3.2523	-8.79873	2.38e-17	2.38e-16	28.4364
CKMT1B	0.541689	1.31269	8.79336	2.49e-17	2.48e-16	28.3956
OLFM3	0.26989	0.177841	8.79159	2.52e-17	2.51e-16	28.3823
FDX1	0.431867	5.1626	8.78931	2.56e-17	2.56e-16	28.365
NRL	0.359587	2.0163	8.78921	2.57e-17	2.56e-16	28.3642
HSD17B10	0.412788	7.47492	8.78792	2.59e-17	2.58e-16	28.3545
ATRNL1	0.505325	0.455089	8.7873	2.6e-17	2.59e-16	28.3498
LCA5L	0.378644	1.62864	8.78697	2.61e-17	2.6e-16	28.3473
ESRRA	0.477914	4.6764	8.78391	2.67e-17	2.66e-16	28.3241
LIFR	0.90371	3.091	8.78356	2.68e-17	2.66e-16	28.3214
METTL7A	0.597876	8.38319	8.78223	2.71e-17	2.69e-16	28.3114
CA2	0.889652	4.10313	8.78143	2.72e-17	2.7e-16	28.3053
NUGGC	0.758057	1.11047	8.77966	2.76e-17	2.74e-16	28.2919
CGN	-0.67018	4.23179	-8.77719	2.81e-17	2.79e-16	28.2732
LETM1	0.391561	4.33127	8.77495	2.86e-17	2.84e-16	28.2563
SOSTDC1	0.699689	0.734073	8.76807	3.02e-17	2.99e-16	28.2042
MIEF2	-0.41874	5.1865	-8.76693	3.04e-17	3.01e-16	28.1956
RIMS4	1.02728	2.05317	8.76692	3.05e-17	3.01e-16	28.1955
MAOB	1.00332	2.62356	8.76535	3.08e-17	3.05e-16	28.1836
DST	-0.748567	2.78367	-8.76483	3.09e-17	3.06e-16	28.1797
ZNF541	0.264703	0.540734	8.7635	3.13e-17	3.09e-16	28.1697
SUCLG1	0.390496	6.18919	8.7609	3.19e-17	3.15e-16	28.15
PFKFB3	-0.71942	3.8925	-8.76035	3.2e-17	3.16e-16	28.1459
CAPG	-0.666097	8.51562	-8.75747	3.27e-17	3.23e-16	28.1241
ABCG2	0.816483	2.79895	8.757	3.29e-17	3.24e-16	28.1205
LRTM2	0.19877	0.120366	8.75624	3.3e-17	3.25e-16	28.1148
SYP	0.308506	1.00376	8.75578	3.32e-17	3.26e-16	28.1113
IQGAP1	-0.596885	6.8025	-8.75543	3.33e-17	3.27e-16	28.1087
UCHL5	0.395807	2.94486	8.75323	3.38e-17	3.32e-16	28.092
TLE1	0.545467	3.56266	8.74999	3.47e-17	3.4e-16	28.0676
HMGA2	-1.09313	3.12252	-8.74998	3.47e-17	3.4e-16	28.0675
MTURN	0.56645	4.27322	8.74636	3.56e-17	3.5e-16	28.0401
DNAJB11	0.477062	4.25967	8.74301	3.66e-17	3.59e-16	28.0148
NEURL1	-0.342906	0.527249	-8.74095	3.72e-17	3.64e-16	27.9993
TSN	-0.425614	6.04585	-8.7409	3.72e-17	3.64e-16	27.9989
NME4	0.452237	5.77275	8.74026	3.74e-17	3.66e-16	27.9941
WFIKKN1	0.287594	0.461414	8.7401	3.74e-17	3.66e-16	27.9929
YPEL1	-0.434908	1.90248	-8.73383	3.92e-17	3.84e-16	27.9456
RAB27B	-0.988689	1.36344	-8.73238	3.97e-17	3.88e-16	27.9346
ACHE	0.521558	1.11104	8.73111	4.01e-17	3.91e-16	27.9251
BMERB1	-0.684583	5.07448	-8.731	4.01e-17	3.91e-16	27.9242
PRPSAP1	0.444425	4.6111	8.72981	4.05e-17	3.95e-16	27.9153
FANCE	-0.455279	3.58526	-8.72964	4.05e-17	3.95e-16	27.914
ID4	0.748412	8.0264	8.72933	4.06e-17	3.96e-16	27.9117
GPR158	0.358561	0.366787	8.72817	4.1e-17	3.99e-16	27.903
SMTN	0.609869	3.1578	8.72773	4.11e-17	4e-16	27.8997
MAP6	0.52836	2.60201	8.72079	4.34e-17	4.22e-16	27.8473
COLEC11	0.859427	2.14465	8.71952	4.38e-17	4.26e-16	27.8378
ADK	-0.444648	5.60869	-8.7191	4.39e-17	4.27e-16	27.8346
RSKR	0.430097	1.4237	8.71726	4.45e-17	4.33e-16	27.8207
LASP1	-0.521846	6.39252	-8.71672	4.47e-17	4.34e-16	27.8166
CD320	-0.524507	6.731	-8.71356	4.58e-17	4.44e-16	27.7929
RIBC1	0.450171	2.44689	8.71335	4.59e-17	4.45e-16	27.7913
TMEM63C	0.542002	1.19294	8.71124	4.66e-17	4.52e-16	27.7754
ENO4	0.230884	0.53065	8.70982	4.71e-17	4.57e-16	27.7647
COX16	0.452394	3.6608	8.70937	4.73e-17	4.58e-16	27.7614
DCBLD2	-0.557408	5.15931	-8.70674	4.83e-17	4.67e-16	27.7416
ZBTB7C	-0.411514	5.2532	-8.70586	4.86e-17	4.7e-16	27.7349
FADS2	0.616151	2.33894	8.70362	4.94e-17	4.78e-16	27.7181
POPDC3	0.721191	0.47535	8.70114	5.04e-17	4.86e-16	27.6995
LSM10	0.353558	5.89714	8.69956	5.1e-17	4.92e-16	27.6875
MYH3	0.640167	1.35979	8.69505	5.28e-17	5.09e-16	27.6536
MCM4	-0.513752	4.27249	-8.695	5.28e-17	5.09e-16	27.6532
PYROXD2	0.621382	3.51697	8.6949	5.28e-17	5.09e-16	27.6525
RASA1	-0.734508	5.46763	-8.69406	5.32e-17	5.12e-16	27.6462
VEGFA	0.840905	6.11903	8.69301	5.36e-17	5.16e-16	27.6383
DONSON	-0.344923	3.06997	-8.69062	5.46e-17	5.25e-16	27.6203
ZNF280B	0.458138	1.93739	8.68976	5.49e-17	5.28e-16	27.6139
DNASE1L3	0.915805	2.62677	8.68673	5.62e-17	5.4e-16	27.5911
RAB17	0.503311	4.68773	8.68664	5.63e-17	5.4e-16	27.5904
RABGGTA	-0.327886	5.28418	-8.6847	5.71e-17	5.48e-16	27.5759
HYOU1	0.852303	5.77487	8.68237	5.81e-17	5.57e-16	27.5584
STX3	-0.427057	4.53158	-8.68129	5.86e-17	5.62e-16	27.5503
H3C10	0.680608	1.72388	8.68121	5.86e-17	5.62e-16	27.5496
SNCAIP	-0.467372	0.791491	-8.68078	5.88e-17	5.63e-16	27.5464
MRPS11	0.342487	3.4486	8.68054	5.89e-17	5.64e-16	27.5446
POLR2J3	-0.618316	1.71256	-8.68052	5.9e-17	5.64e-16	27.5444
HLA-A	-0.633603	10.3743	-8.67869	5.98e-17	5.71e-16	27.5307
EXOC3L1	0.596601	3.16647	8.6786	5.98e-17	5.71e-16	27.5301
PRR15L	0.918841	6.28472	8.67855	5.98e-17	5.71e-16	27.5297
IGSF6	-0.747778	2.98203	-8.67805	6.01e-17	5.73e-16	27.526
GPR61	0.48786	0.987198	8.67798	6.01e-17	5.73e-16	27.5254
CRELD1	0.477128	1.9182	8.67407	6.19e-17	5.9e-16	27.496
FHOD1	-0.515754	5.2256	-8.67134	6.32e-17	6.02e-16	27.4756
MEF2C	0.523603	3.55706	8.67109	6.33e-17	6.03e-16	27.4737
NUDT17	-0.582644	3.35899	-8.66785	6.49e-17	6.18e-16	27.4494
YPEL4	-0.63223	1.6897	-8.66494	6.64e-17	6.31e-16	27.4276
MAPK12	0.369934	1.31068	8.66427	6.67e-17	6.34e-16	27.4225
IGFN1	-1.7845	2.71879	-8.6559	7.11e-17	6.75e-16	27.3598
HSPA5	0.738818	9.78667	8.65443	7.19e-17	6.83e-16	27.3488
TNFRSF1A	-0.453009	7.06007	-8.65408	7.21e-17	6.84e-16	27.3462
OLFM2	1.08225	3.59758	8.64724	7.59e-17	7.2e-16	27.295
MALSU1	0.332629	4.22531	8.64715	7.6e-17	7.2e-16	27.2943
DOCK5	0.545202	3.16522	8.64655	7.63e-17	7.23e-16	27.2898
GOT2	0.362386	6.43804	8.64396	7.79e-17	7.37e-16	27.2704
DUSP2	-1.17707	3.3775	-8.6435	7.81e-17	7.39e-16	27.267
RDH12	0.548869	1.07423	8.64311	7.84e-17	7.41e-16	27.2641
TIMP2	-0.571323	6.55753	-8.64152	7.93e-17	7.5e-16	27.2521
DENND6A	0.482308	4.05487	8.64039	8e-17	7.56e-16	27.2437
MXRA5	-0.847273	5.49112	-8.63997	8.03e-17	7.58e-16	27.2405
SLC2A13	-0.520311	2.19983	-8.63853	8.11e-17	7.66e-16	27.2298
ZNF395	-0.464367	5.00027	-8.63587	8.28e-17	7.81e-16	27.2099
P3H4	0.410541	4.99828	8.63549	8.3e-17	7.82e-16	27.2071
RGS14	0.488925	4.16923	8.63547	8.3e-17	7.82e-16	27.2069
TSPO2	-0.151036	0.257738	-8.63269	8.48e-17	7.99e-16	27.1861
LGALS12	-0.177091	0.268981	-8.63093	8.6e-17	8.09e-16	27.1729
BCDIN3D	0.38956	2.34632	8.6298	8.67e-17	8.15e-16	27.1645
C3orf18	0.44748	3.80696	8.62939	8.7e-17	8.17e-16	27.1614
PLCL1	0.501228	1.73776	8.62912	8.71e-17	8.18e-16	27.1594
ALDH9A1	0.539831	7.19262	8.62909	8.72e-17	8.18e-16	27.1592
PSORS1C1	-0.555779	1.47385	-8.62814	8.78e-17	8.24e-16	27.1521
REXO2	-0.354715	4.20198	-8.62686	8.86e-17	8.31e-16	27.1425
EDNRB	0.984513	4.46534	8.6251	8.98e-17	8.42e-16	27.1293
KLHL2	-0.473518	5.37068	-8.62459	9.02e-17	8.45e-16	27.1255
CAMK1D	0.631916	3.67959	8.62317	9.12e-17	8.54e-16	27.1149
LGALS1	-0.870014	8.80697	-8.62252	9.16e-17	8.57e-16	27.1101
MYH10	-0.760388	6.15764	-8.62152	9.23e-17	8.63e-16	27.1026
MCTP2	-0.524861	3.76869	-8.61785	9.49e-17	8.87e-16	27.0752
SELENBP1	0.67375	7.29684	8.61741	9.52e-17	8.9e-16	27.0719
CNTN2	0.0812842	0.0829684	8.61713	9.54e-17	8.91e-16	27.0698
SNPH	0.538406	3.05667	8.6154	9.67e-17	9.02e-16	27.0569
CLDN2	-1.2963	2.85652	-8.61176	9.94e-17	9.27e-16	27.0297
TMEM232	0.290143	0.901886	8.60973	1.01e-16	9.41e-16	27.0146
TIAM1	-0.99157	3.85921	-8.60227	1.07e-16	9.95e-16	26.9589
POLR3C	-0.329335	4.34527	-8.59919	1.09e-16	1.02e-15	26.936
NT5M	0.418892	2.15721	8.59842	1.1e-16	1.02e-15	26.9302
ACE	0.681892	3.16995	8.59777	1.11e-16	1.03e-15	26.9253
TUBA1A	-0.614143	6.37926	-8.59566	1.12e-16	1.04e-15	26.9097
CYP26B1	0.819729	1.92231	8.59471	1.13e-16	1.05e-15	26.9026
SFRP1	1.348	2.30046	8.59264	1.15e-16	1.07e-15	26.8872
NUPR1	0.818903	2.42864	8.59091	1.16e-16	1.08e-15	26.8743
BCL9	-0.574546	5.00888	-8.58873	1.18e-16	1.1e-15	26.858
NTHL1	0.462123	4.06436	8.58668	1.2e-16	1.11e-15	26.8427
PARP8	0.473054	4.41092	8.58665	1.2e-16	1.11e-15	26.8425
ZNF275	0.466849	3.40806	8.58468	1.22e-16	1.13e-15	26.8278
SPRED3	-0.422765	1.56816	-8.57896	1.27e-16	1.18e-15	26.7853
FRMPD1	0.142607	0.187036	8.57638	1.3e-16	1.2e-15	26.7661
C1orf127	0.211848	0.465818	8.57357	1.33e-16	1.23e-15	26.7451
CTSK	-0.836827	3.24323	-8.57091	1.35e-16	1.25e-15	26.7254
DOK2	-0.792853	2.99859	-8.56843	1.38e-16	1.27e-15	26.7069
LRATD1	-0.731553	3.58624	-8.5633	1.43e-16	1.32e-15	26.6688
NLGN2	-0.513451	3.59502	-8.55763	1.5e-16	1.38e-15	26.6266
BIK	0.504287	2.82162	8.5575	1.5e-16	1.38e-15	26.6256
TBXA2R	0.622791	2.47505	8.5562	1.51e-16	1.39e-15	26.616
CFAP94	0.494022	2.34565	8.5491	1.6e-16	1.47e-15	26.5633
DIRAS3	-1.09917	5.07639	-8.54711	1.62e-16	1.49e-15	26.5485
BVES	0.533635	0.962027	8.54647	1.63e-16	1.5e-15	26.5438
IP6K3	1.00102	2.4301	8.54615	1.63e-16	1.5e-15	26.5414
C12orf73	0.378393	2.79907	8.54583	1.64e-16	1.5e-15	26.539
NRSN2	0.35449	5.91093	8.54574	1.64e-16	1.5e-15	26.5383
FRMPD3	0.763817	1.99428	8.54496	1.65e-16	1.51e-15	26.5325
PODNL1	-0.772705	1.2333	-8.54444	1.65e-16	1.52e-15	26.5287
SHBG	0.291393	0.961699	8.54295	1.67e-16	1.53e-15	26.5176
GNG11	0.676821	5.07108	8.54256	1.68e-16	1.54e-15	26.5147
CDIP1	0.497905	5.29205	8.53867	1.73e-16	1.58e-15	26.4858
RAP1GAP	0.933159	6.04652	8.53385	1.79e-16	1.64e-15	26.4501
CFB	-0.51406	0.934092	-8.53227	1.81e-16	1.66e-15	26.4384
LCA5	-0.665031	4.00914	-8.53181	1.82e-16	1.66e-15	26.435
NELFCD	0.388409	5.24842	8.53159	1.82e-16	1.66e-15	26.4334
COPS9	0.440065	5.79614	8.53057	1.83e-16	1.68e-15	26.4258
BTNL8	0.181186	0.224745	8.5299	1.84e-16	1.68e-15	26.4208
NAGLU	0.423134	5.90219	8.52706	1.88e-16	1.72e-15	26.3998
SLC2A8	0.40887	3.76813	8.52587	1.9e-16	1.73e-15	26.391
FUT3	-0.711727	1.02852	-8.52215	1.95e-16	1.78e-15	26.3634
PHLDA2	-0.899546	5.70477	-8.52188	1.96e-16	1.78e-15	26.3614
RAB11FIP1	-0.932758	4.01651	-8.52037	1.98e-16	1.8e-15	26.3503
ARHGEF26	-0.519061	3.3234	-8.51936	2e-16	1.82e-15	26.3428
DEGS1	-0.434322	7.45396	-8.51856	2.01e-16	1.83e-15	26.3369
GARNL3	0.413104	1.57513	8.51839	2.01e-16	1.83e-15	26.3356
IQCH	0.384706	1.37031	8.51827	2.01e-16	1.83e-15	26.3347
MYBPH	-0.97357	1.62005	-8.51672	2.04e-16	1.85e-15	26.3232
HK1	0.45235	6.26705	8.51507	2.06e-16	1.87e-15	26.311
LIPG	1.02677	5.69476	8.51505	2.06e-16	1.87e-15	26.3109
FAM53A	0.350943	1.72403	8.51086	2.13e-16	1.93e-15	26.2798
FMOD	0.832558	6.11207	8.50833	2.17e-16	1.97e-15	26.2611
KCNJ10	0.42543	0.695634	8.50759	2.18e-16	1.98e-15	26.2556
HSD11B1	-0.719817	1.48523	-8.50513	2.22e-16	2.01e-15	26.2375
MYCT1	0.68804	3.79412	8.50329	2.25e-16	2.04e-15	26.2238
TNFSF9	-0.945206	1.74012	-8.50196	2.27e-16	2.06e-15	26.214
FOXP2	0.56517	1.02072	8.49887	2.33e-16	2.1e-15	26.1912
C10orf90	0.328544	0.220955	8.49841	2.34e-16	2.11e-15	26.1878
INPP5F	-0.506097	4.23215	-8.49832	2.34e-16	2.11e-15	26.1871
CCM2L	0.520359	2.37562	8.49829	2.34e-16	2.11e-15	26.1869
SQLE	0.48065	3.41874	8.49626	2.37e-16	2.14e-15	26.1719
GAB2	-0.556773	3.96389	-8.49572	2.38e-16	2.15e-15	26.1678
PXMP2	0.348213	1.49022	8.49327	2.43e-16	2.19e-15	26.1498
PNPLA2	-0.424865	5.71715	-8.48933	2.5e-16	2.25e-15	26.1206
NIBAN2	-0.513237	8.20838	-8.48775	2.53e-16	2.28e-15	26.109
KCNJ2	-1.1314	3.83795	-8.48694	2.55e-16	2.29e-15	26.1031
TBC1D9	-0.574163	4.17797	-8.4857	2.57e-16	2.31e-15	26.0939
PCP4L1	0.914414	1.55137	8.48551	2.57e-16	2.31e-15	26.0925
ZMYND15	-0.373065	2.11765	-8.48417	2.6e-16	2.34e-15	26.0826
TRPC5	-1.36912	2.35025	-8.48097	2.66e-16	2.39e-15	26.059
C9orf152	0.35084	0.342757	8.47732	2.74e-16	2.46e-15	26.032
TCEAL2	1.33047	2.93064	8.47662	2.75e-16	2.47e-15	26.0268
RYR2	0.621744	0.853395	8.47096	2.87e-16	2.57e-15	25.9851
SLC33A1	0.395609	3.30166	8.47017	2.89e-16	2.59e-15	25.9793
PMEPA1	-0.548333	5.18464	-8.46956	2.9e-16	2.6e-15	25.9748
SLC35A4	0.312465	6.25162	8.46878	2.92e-16	2.61e-15	25.9691
NECAB1	0.485076	1.0404	8.46865	2.92e-16	2.61e-15	25.9681
RABGGTB	-0.292966	4.74298	-8.46684	2.96e-16	2.65e-15	25.9547
RNASET2	0.380632	2.54705	8.46678	2.96e-16	2.65e-15	25.9543
FAAH2	-0.461834	4.70517	-8.46634	2.97e-16	2.65e-15	25.9511
LRRC6	0.448375	2.96401	8.46593	2.98e-16	2.66e-15	25.948
SPINK5	0.684538	1.10801	8.4647	3.01e-16	2.68e-15	25.9389
STK32C	0.348091	2.73551	8.46372	3.03e-16	2.7e-15	25.9317
IL22RA1	0.81061	2.40018	8.46371	3.03e-16	2.7e-15	25.9317
LTF	1.05733	2.4566	8.46315	3.04e-16	2.71e-15	25.9275
AFAP1	-0.443995	2.14679	-8.46203	3.07e-16	2.73e-15	25.9193
TTC34	0.337707	0.752697	8.45954	3.13e-16	2.78e-15	25.9009
ECI1	0.531375	6.65908	8.45935	3.13e-16	2.78e-15	25.8996
C19orf73	0.419661	2.05434	8.45905	3.14e-16	2.79e-15	25.8973
ELOVL7	-0.714333	4.82487	-8.44859	3.39e-16	3.01e-15	25.8203
GAL3ST3	0.732834	4.23152	8.44455	3.5e-16	3.1e-15	25.7906
ZHX2	-0.595722	5.90306	-8.44117	3.59e-16	3.18e-15	25.7657
PRR18	0.238257	0.293756	8.43961	3.63e-16	3.22e-15	25.7543
CXXC5	-0.473744	6.5169	-8.43938	3.63e-16	3.22e-15	25.7526
FBN3	-0.868645	3.04905	-8.43602	3.73e-16	3.3e-15	25.7278
PDHA1	0.342209	5.68769	8.42844	3.94e-16	3.49e-15	25.6721
ATP5F1E	0.391951	6.96776	8.42651	4e-16	3.54e-15	25.658
MMP20	-0.10916	0.0916154	-8.42591	4.02e-16	3.56e-15	25.6535
BMP1	-0.528971	5.41455	-8.42567	4.03e-16	3.56e-15	25.6518
DYRK3	0.437527	2.4791	8.42512	4.04e-16	3.57e-15	25.6478
C12orf60	0.25234	0.907064	8.42366	4.09e-16	3.61e-15	25.637
DAW1	-0.323688	0.420979	-8.42202	4.14e-16	3.65e-15	25.625
SP100	-0.368916	4.34503	-8.42105	4.17e-16	3.68e-15	25.6179
CC2D2A	0.422169	2.30033	8.41789	4.27e-16	3.76e-15	25.5947
PHF19	-0.420915	3.47592	-8.41599	4.33e-16	3.81e-15	25.5808
SLC2A1	-0.516202	4.51491	-8.41536	4.35e-16	3.83e-15	25.5761
IGBP1	-0.405536	7.50226	-8.41167	4.47e-16	3.94e-15	25.549
MOK	0.412392	2.10168	8.4092	4.55e-16	4.01e-15	25.5309
PDIA3	0.530667	9.22014	8.40867	4.57e-16	4.02e-15	25.5271
CTSE	-1.43909	3.93843	-8.40643	4.65e-16	4.09e-15	25.5107
NFIA	0.447955	2.71145	8.40455	4.71e-16	4.14e-15	25.4969
TMPO	-0.44357	4.32646	-8.40181	4.81e-16	4.22e-15	25.4767
ZDHHC16	-0.311213	5.13077	-8.39335	5.12e-16	4.5e-15	25.4148
KITLG	0.622823	2.54464	8.39171	5.19e-16	4.55e-15	25.4027
C9orf16	-0.480974	6.82578	-8.39047	5.23e-16	4.59e-15	25.3937
H2AC20	0.445688	1.51246	8.38941	5.27e-16	4.62e-15	25.3859
FXN	0.279956	1.92662	8.38612	5.4e-16	4.73e-15	25.3619
CXCL2	-1.38948	4.27645	-8.38369	5.5e-16	4.82e-15	25.3441
KLHL3	0.618646	2.41103	8.38285	5.54e-16	4.85e-15	25.338
ALKAL1	-0.677426	3.26184	-8.38213	5.57e-16	4.87e-15	25.3326
GBP3	-0.941811	5.3432	-8.38012	5.65e-16	4.94e-15	25.318
TMOD1	0.926818	2.79374	8.37953	5.68e-16	4.96e-15	25.3136
DNAAF3	0.439508	1.13665	8.37401	5.91e-16	5.16e-15	25.2733
PDGFD	0.755862	4.3407	8.37376	5.92e-16	5.17e-15	25.2714
TLCD1	-0.46912	4.38985	-8.37375	5.93e-16	5.17e-15	25.2714
MFSD3	0.495679	5.58217	8.37184	6.01e-16	5.24e-15	25.2574
HKDC1	0.872741	2.09093	8.37133	6.03e-16	5.26e-15	25.2537
PRPS1	0.491915	5.17341	8.366	6.28e-16	5.47e-15	25.2148
CHRFAM7A	0.292652	0.477459	8.36464	6.34e-16	5.52e-15	25.2048
RHOV	-0.889108	2.7284	-8.36459	6.34e-16	5.52e-15	25.2045
MTRES1	0.344518	4.66843	8.36315	6.41e-16	5.57e-15	25.1939
MYO3B	-0.470021	2.21054	-8.36089	6.52e-16	5.67e-15	25.1774
HK3	-0.758705	2.08349	-8.35969	6.58e-16	5.71e-15	25.1687
KPTN	0.320168	2.42048	8.35956	6.58e-16	5.72e-15	25.1677
MYEOV	-0.560584	0.86375	-8.35785	6.67e-16	5.79e-15	25.1552
SCN4B	0.823671	3.1689	8.3528	6.92e-16	6e-15	25.1184
CFL2	0.415981	4.49926	8.35256	6.93e-16	6.01e-15	25.1166
NFYC	0.337337	4.96426	8.3489	7.12e-16	6.17e-15	25.0899
UQCRQ	0.389839	6.26479	8.34265	7.46e-16	6.46e-15	25.0443
DDX60	-0.659158	4.25276	-8.34216	7.49e-16	6.48e-15	25.0408
NOVA2	0.454751	1.79923	8.34105	7.55e-16	6.53e-15	25.0327
RNF43	-0.382248	1.61172	-8.34093	7.56e-16	6.54e-15	25.0318
ATG4D	0.345232	4.27411	8.33921	7.65e-16	6.62e-15	25.0192
H2BC15	0.308354	0.980079	8.33895	7.67e-16	6.63e-15	25.0173
STYK1	-0.293984	0.564096	-8.33754	7.75e-16	6.69e-15	25.0071
GPX3	0.783386	11.1729	8.33748	7.75e-16	6.69e-15	25.0067
ADRB1	0.355927	0.663715	8.33701	7.78e-16	6.71e-15	25.0032
ITGBL1	-0.750058	1.43985	-8.33623	7.83e-16	6.75e-15	24.9975
CTDSPL	-0.461579	4.21276	-8.3318	8.09e-16	6.97e-15	24.9652
CDC25B	-0.601629	5.52633	-8.32955	8.22e-16	7.08e-15	24.9489
CCKBR	-0.511055	0.831114	-8.32504	8.5e-16	7.32e-15	24.9161
COMTD1	0.5212	4.06917	8.32467	8.52e-16	7.33e-15	24.9133
APOD	-1.25079	4.06167	-8.32116	8.75e-16	7.52e-15	24.8878
SLC1A1	0.935163	4.29536	8.32016	8.81e-16	7.57e-15	24.8806
SGK1	0.76193	4.46398	8.31927	8.87e-16	7.62e-15	24.8741
TMEM236	-0.22132	0.400652	-8.3181	8.95e-16	7.68e-15	24.8656
DDX52	-0.380058	3.29854	-8.31513	9.15e-16	7.85e-15	24.844
ID3	0.749121	7.9654	8.31411	9.22e-16	7.9e-15	24.8366
CEBPG	0.557003	4.80358	8.31329	9.27e-16	7.95e-15	24.8306
CBLN4	-0.910778	1.66462	-8.31179	9.37e-16	8.03e-15	24.8197
MT1X	0.917071	5.34688	8.31092	9.44e-16	8.08e-15	24.8133
ANKS1B	0.378367	0.947988	8.31016	9.49e-16	8.12e-15	24.8078
CCDC126	0.436287	3.11047	8.30731	9.69e-16	8.29e-15	24.7871
JPH2	0.360007	0.759846	8.30205	1.01e-15	8.61e-15	24.7489
RNF212	0.789681	2.15737	8.29847	1.03e-15	8.84e-15	24.7229
IDS	-0.524145	1.93976	-8.29596	1.05e-15	9e-15	24.7046
CFAP157	0.2189	0.728126	8.29321	1.08e-15	9.18e-15	24.6847
IL11RA	0.607574	4.21631	8.29171	1.09e-15	9.28e-15	24.6738
PLAC8L1	0.16331	0.299751	8.29127	1.09e-15	9.3e-15	24.6707
C11orf94	0.253092	0.540664	8.2905	1.1e-15	9.35e-15	24.6651
CXCL5	-0.641728	0.70606	-8.28748	1.12e-15	9.56e-15	24.6431
BTBD16	0.11794	0.148518	8.28718	1.12e-15	9.57e-15	24.641
BAIAP2	-0.490487	4.06429	-8.28484	1.14e-15	9.74e-15	24.624
DHRS7B	0.345225	4.53689	8.28479	1.14e-15	9.74e-15	24.6236
CD300LF	-0.648278	1.92338	-8.28234	1.16e-15	9.91e-15	24.6059
TTYH2	0.721945	3.12378	8.27981	1.19e-15	1.01e-14	24.5875
ADORA1	-0.791522	4.78126	-8.27927	1.19e-15	1.01e-14	24.5836
HLA-DRB1	-0.985045	9.4248	-8.2776	1.21e-15	1.02e-14	24.5715
[truncated: 14,969 more rows]
